# Supplementary material for: Establishment and Evaluation of a Parametric Population Pharmacokinetic Model Repository for Ganciclovir and Valganciclovir
Source: MDPI journal article supplement (doi:10.3390/pharmaceutics15071801), 2023-06-23
Supplement: s1 [file s1]

## Contents of Supplementary Materials

|                                                                                                                              |    |
|------------------------------------------------------------------------------------------------------------------------------|----|
| Table S1. The uniform covariate range and reference covariate value .....                                                    | 2  |
| Table S2. Total probability of target attainment of pediatrics and adults.....                                               | 3  |
| Figure S1. Similarity comparison (%) of simulated pharmacokinetic profiles after intravenous infusion of ganciclovir. ....   | 4  |
| Figure S2. Similarity comparison (%) of simulated pharmacokinetic profiles after oral administration of valganciclovir. .... | 5  |
| Search strategies .....                                                                                                      | 6  |
| R Codes of Model Repository Establishment.....                                                                               | 8  |
| Lalagkas et al.(2023).....                                                                                                   | 8  |
| Nguyen et al.(2021).....                                                                                                     | 11 |
| Franck et al.(2021).....                                                                                                     | 19 |
| Chen et al.(2021).....                                                                                                       | 25 |
| Li et al.(2021) .....                                                                                                        | 27 |
| Krens et al.(2020) .....                                                                                                     | 31 |
| Facchin et al.(2019).....                                                                                                    | 33 |
| Horvatits et al.(2014) .....                                                                                                 | 37 |
| Vezina et al.(2014).....                                                                                                     | 39 |
| Vezina et al.(2010).....                                                                                                     | 44 |
| Caldés et al.(2009).....                                                                                                     | 46 |
| Perrottet et al.(2009).....                                                                                                  | 49 |
| Zhao et al.(2009) .....                                                                                                      | 57 |
| Acosta et al.(2007).....                                                                                                     | 59 |
| Zhou et al.(1996).....                                                                                                       | 62 |
| Yuen et al.(1995).....                                                                                                       | 64 |
| R Codes of Covariate Effects Evaluation .....                                                                                | 79 |
| R Codes of AUC Calculator based on MAP-BE .....                                                                              | 82 |
| # Globally used objects and functions .....                                                                                  | 82 |
| # Define Shiny Server.....                                                                                                   | 89 |
| # Define UI of Shiny app.....                                                                                                | 93 |
| Validation of the AUC <sub>0-24h</sub> calculator with NONMEM.....                                                           | 95 |

**Table S1.** The uniform covariate range and reference covariate value

| Covariate                         |          | Covariate range | Reference covariate value |
|-----------------------------------|----------|-----------------|---------------------------|
| Weight (kg)                       | Neonates | 1-5             | 3                         |
|                                   | Infants  | 5-16            | 10                        |
|                                   | Children | 16-40           | 30                        |
|                                   | Adults   | 40-100          | 70                        |
| eGFR (mL/min/1.73m <sup>2</sup> ) |          | 20-120          | 90                        |
| CLcr (mL/min)                     |          | 20-130          | 90                        |

CLcr: creatinine clearance; eGFR: the estimated glomerular filtration rate.

**Table S2.** Total probability of target attainment of pediatrics and adults.

| Drug<br>Population<br>Dose regimen                       | Ganciclovir i.v. |             | Valganciclovir p.o. |            |
|----------------------------------------------------------|------------------|-------------|---------------------|------------|
|                                                          | Pediatrics       | Adults      | Pediatrics          | Adults     |
|                                                          | 5 mg/kg/12h      | 5 mg/kg/12h | 10 mg/kg/12h        | 900 mg/12h |
| PTA (%) of $AUC \leq 40 \text{ mg}\cdot\text{h/L}$       | 23.43            | 20.92       | 30.34               | 14.77      |
| PTA (%) of $40 < AUC \leq 80 \text{ mg}\cdot\text{h/L}$  | 46.44            | 24.20       | 40.47               | 20.44      |
| PTA (%) of $80 < AUC \leq 120 \text{ mg}\cdot\text{h/L}$ | 18.88            | 17.89       | 20.71               | 30.56      |
| PTA (%) of $AUC \geq 120 \text{ mg}\cdot\text{h/L}$      | 20.02            | 51.24       | 18.04               | 46.01      |

AUC: area-under-the-concentration-time-curve; i.v.: intravenous administration; p.o.: oral administration; PTA: probability of target attainment.

**Figure S1.** Similarity comparison (%) of simulated pharmacokinetic profiles after intravenous infusion of ganciclovir.

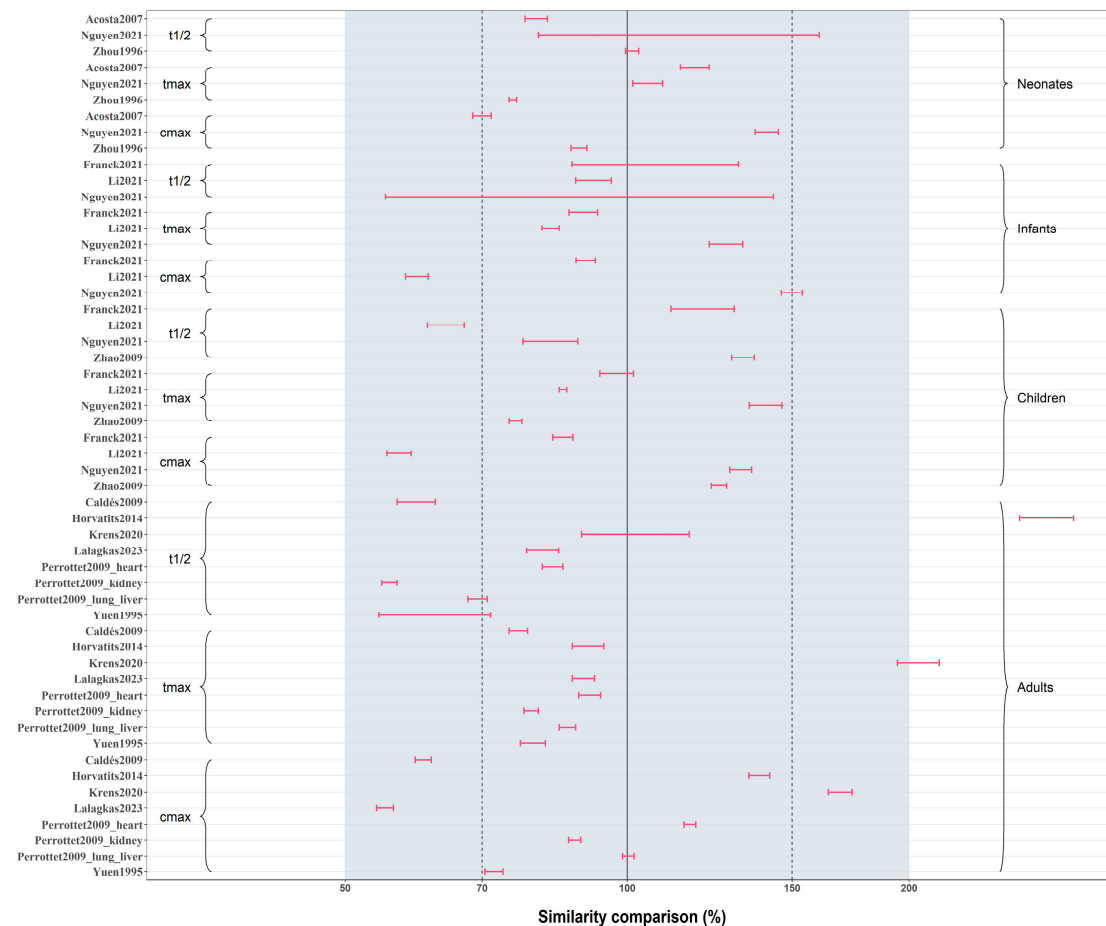

The red horizontal bars represent the geometric mean ratio with 95% CI of each model. The shaded gray area ranges from 50% to 200% of reference values. The geometric means of PK parameters in each age group was considered to be the reference values.

**Figure S2.** Similarity comparison (%) of simulated pharmacokinetic profiles after oral administration of valganciclovir.

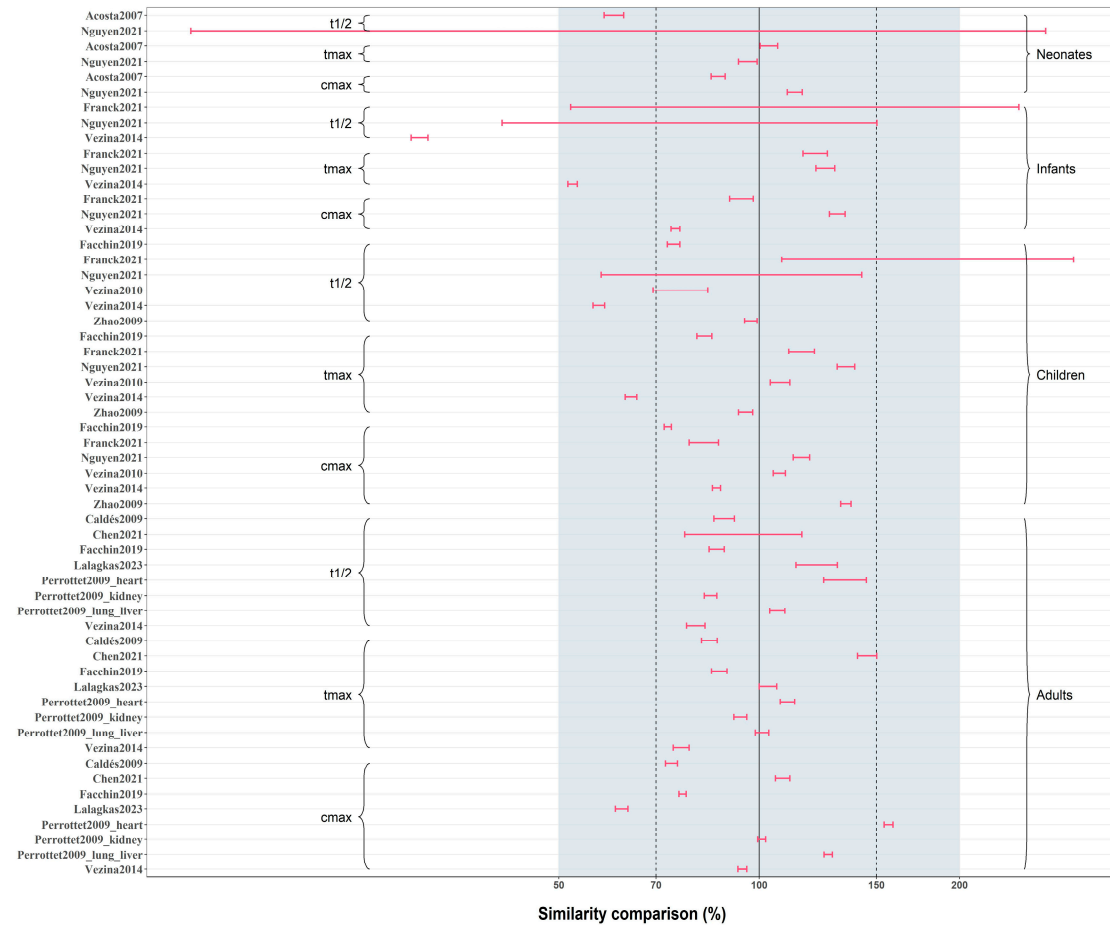

The red horizontal bars represent the geometric mean ratio with 95% CI of each model. The shaded gray area ranges from 50% to 200% of reference values. The geometric means of PK parameters in each age group was considered to be the reference values.

## Search strategies

### Search date: May 28, 2023

#### 1. Search strategy of PubMed

'ganciclovir' or 'gancyclovir' or 'BW-759' or 'ganciclovir sodium' or 'Ganciclovir, Monosodium Salt' or 'RS-21592' or 'BIOLF-62' or 'Cytovene' or 'valganciclovir' or 'Ganciclovir L-valyl Ester' or 'Ganciclovir L valyl Ester' or 'Valcyt' or 'Valganciclovir Hydrochloride' or 'Valcyte' and 'population pharmacokinetic' or 'pharmacokinetic' or 'nonlinear mixed effect model' or 'NONMEM' or 'Pmetrics' or 'WINNONMIX' or 'ADAPT' or 'P-PHARM' or 'nlmixr' or 'NLME' or 'USC\*PACK' or 'MONOLIX'.

*Filters applied: Humans, English.*

#### 2. Search strategy of Embase

| ▼ Search History (5)     |     |                                         |         |                                                                 |
|--------------------------|-----|-----------------------------------------|---------|-----------------------------------------------------------------|
| <input type="checkbox"/> | # ▲ | Searches                                | Results | Type      Actions                                               |
| <input type="checkbox"/> | 1   | exp ganciclovir/ or exp valganciclovir/ | 31483   | Advanced <a href="#">Display Results</a> <a href="#">More ▼</a> |
| <input type="checkbox"/> | 2   | population pharmacokinetic.mp.          | 8356    | Advanced <a href="#">Display Results</a> <a href="#">More ▼</a> |
| <input type="checkbox"/> | 3   | exp pharmacokinetic modeling software/  | 1872    | Advanced <a href="#">Display Results</a> <a href="#">More ▼</a> |
| <input type="checkbox"/> | 4   | 2 or 3                                  | 9615    | Advanced <a href="#">Display Results</a> <a href="#">More ▼</a> |
| <input type="checkbox"/> | 5   | 1 and 4                                 | 30      | Advanced <a href="#">Display Results</a> <a href="#">More ▼</a> |

#### 3. Search strategy of Scopus

( TITLE-ABS-KEY ( ganciclovir\* ) OR TITLE-ABS-KEY ( gancyclovir ) OR TITLE-ABS-KEY ( bw-759 ) OR TITLE-ABS-KEY ( ganciclovir AND sodium ) OR TITLE-ABS-KEY ( ganciclovir, AND monosodium AND salt ) OR TITLE-ABS-KEY ( rs-21592 ) OR TITLE-ABS-KEY ( biolf-62 ) OR TITLE-ABS-KEY ( cytovene ) OR TITLE-ABS-KEY ( valganciclovir\* ) OR TITLE-ABS-KEY ( ganciclovir AND l-valyl AND ester ) OR TITLE-ABS-KEY ( ganciclovir AND l AND valyl AND ester ) OR TITLE-ABS-KEY ( valcyt ) OR TITLE-ABS-KEY ( valganciclovir AND hydrochloride ) OR TITLE-ABS-KEY ( valcyte ) ) AND ( TITLE-ABS-KEY ( population AND pharmacokinetic ) OR TITLE-ABS-KEY ( pharmacokinetics ) OR TITLE-ABS-KEY ( nonlinear AND mixed AND effect AND model ) OR TITLE-ABS-KEY ( nonmem ) OR TITLE-ABS-KEY ( pmetrics ) OR TITLE-ABS-KEY ( winnonmix ) OR TITLE-ABS-KEY ( adapt ) OR TITLE-ABS-KEY ( p-pharm ) OR TITLE-ABS-KEY ( nlmixr ) OR TITLE-ABS-KEY ( nlme ) OR TITLE-ABS-KEY ( usc\*pack ) OR TITLE-ABS-KEY ( monolix ) ) AND ( EXCLUDE ( DOCTYPE , "re" ) ) AND ( LIMIT-TO ( LANGUAGE , "English" ) ) AND ( LIMIT-TO ( EXACTKEYWORD , "Ganciclovir" ) OR LIMIT-TO ( EXACTKEYWORD , "Human" ) OR LIMIT-TO ( EXACTKEYWORD , "Humans" ) OR LIMIT-TO ( EXACTKEYWORD , "Male" ) OR LIMIT-TO ( EXACTKEYWORD , "Female" ) OR LIMIT-TO ( EXACTKEYWORD , "Adult" ) OR LIMIT-TO ( EXACTKEYWORD , "Valganciclovir" ) OR LIMIT-TO ( EXACTKEYWORD , "Middle Aged" ) OR LIMIT-TO ( EXACTKEYWORD , "Child" ) OR LIMIT-TO ( EXACTKEYWORD , "Aged" ) OR LIMIT-TO ( EXACTKEYWORD , "Adolescent" ) OR LIMIT-TO ( EXACTKEYWORD , "Infant" ) OR LIMIT-TO ( EXACTKEYWORD , "Child, Preschool" ) OR LIMIT-TO ( EXACTKEYWORD , "Preschool Child" ) OR EXCLUDE ( EXACTKEYWORD , "Nonhuman" ) OR EXCLUDE

( EXACTKEYWORD , "Human Cell" ) OR EXCLUDE ( EXACTKEYWORD , "Human Tissue" ) OR EXCLUDE ( EXACTKEYWORD , "Animals" ) OR LIMIT-TO ( EXACTKEYWORD , "Newborn" ) OR LIMIT-TO ( EXACTKEYWORD , "Infant, Newborn" ) OR LIMIT-TO ( EXACTKEYWORD , "Young Adult" ) OR LIMIT-TO ( EXACTKEYWORD , "School Child" ) OR LIMIT-TO ( EXACTKEYWORD , "Children" ) )

#### 4. Search strategy of Web of Science

("ganciclovir" or "gancyclovir" or "BW-759" or "ganciclovir sodium" or "Ganciclovir, Monosodium Salt" or "RS-21592" or "BIOLF-62" or "Cytovene" or "valganciclovir" or "Ganciclovir L-valyl Ester" or "Ganciclovir L valyl Ester" or "valcyt" or "valganciclovir hydrochloride" or "valcyte") AND ("population pharmacokinetic" or "pharmacokinetic" or "nonlinear mixed effect model" or "NONMEM" or "Pmetrics" or "WINNONMIX" or "ADAPT" or "P-PHARM" or "nlmixr" or "NLME" or "USC\*PACK" or "MONOLIX")

137 条来自 所有数据库的结果:

精炼依据:
NOT 文献类型: 综述论文 X
语种: English X

MeSH 主题词: Humans or Ganciclovir or Female or Male or Valganciclovir or Adult or Middle Aged or Child or Adolescent or Aged or Child Preschool or Infant or Infant Newbor... X

NOT MeSH 主题词: Animals or Mice or Rats or Rabbits X
NOT MeSH 主题词: Cells Cultured X

#### Inclusion criteria:

Inclusion criteria were imposed during study selection. Eligible papers must also meet the following criteria:

- (1) GCV was administered intravenously (papers with oral administration were excluded)
- (2) VGCV was administered orally
- (3) PPK modeling was undertaken via a parametric non-linear mixed effect approach.

#### Exclusion criteria:

We excluded studies that fulfilled the following criteria:

- (1) non-human studies,
- (2) not written in English,
- (3) review or methodology studies,
- (4) non-PPK studies,
- (5) studies that used duplicate data or overlapping cohorts with other studies (we selected the study with a larger sample size and excluded the rest)
- (6) incomplete PPK parameter or covariate information.

## R Codes of Model Repository Establishment

```
# Establish a model repository of parametric PPK models for GCV and
VGCV using RxODE
# Author: Wenyu Yang
# Email: 21211030109@m.fudan.edu.cn

rm(list=ls())
#set working directory to current folder
curr.dir<-dirname(rstudioapi::getActiveDocumentContext()$path)
setwd(curr.dir)

# load R packages
library(tidyverse) # for data visualisation and manipulation
library(rxode2) # for simulation
library(cowplot) # for combine figures

#create fold for figure output
output_dir <- "simPK"
if (!file.exists(output_dir)) {dir.create (output_dir)}
```

### Lalagkas et al.(2023)

```
# 1.##Lalagkas et al.(2023)## -----
-----
# Define model -----
-----
# CL =  $6.93 \times (\text{CKD-EPI}/55)^{0.817} \times (\text{BW}/70)^{0.75}$  (L/h)
# V2 =  $43.1 \times (\text{BW}/70)$  (L)
# Q =  $9.23 \times (\text{BW}/70)^{0.75}$  (L/h)
# V3 =  $219 \times (\text{BW}/70)$  (L)
# Ka = 0.766 (h-1)
# F1 = 0.699
# Tlag = 0.331 (h)
# BSV (CV%): CL = 29.9%, V2 = 36.1%, V3 = 103.4%, Ka = 45.7%, F1 =
16.6%
# prop.err = 0.282, add.err = 0.237 mg/L
set.seed(123456)
rxSetSeed(123456)

mod1 <- rxode2({
```



```

CL   = TVCL*exp(eta.CL);
V2   = TVV2*exp(eta.V2);
Q     = TVQ;
V3   = TVV3*exp(eta.V3);
KA   = TVKA*exp(eta.KA);
F1   = TVF1*exp(eta.F1);

C2 = centr/V2;
C3 = peri/V3;
d/dt(depot) = -KA*depot;
d/dt(centr) = F1*KA*depot - CL*C2 - Q*C2 + Q*C3;
d/dt(peri) = Q*C2 - Q*C3;
alag(depot) = TLAG;

cp = C2*(1 + prop.err.sd) + add.err.sd;
})

# Adults -----
-----
# Define typical patient: adults
BW <- 70 # kg
SCR <- 95/88.4 # mg/dL (1mg/dL = 88.4umol/L)
AGE <- 40 # years
k <- 0.9 # k = 9 for males, k = 0.7 for females
a <- 0.411 # a = 0.411 for males, a = 0.329 for females
CKD_EPI <- 141*min(SCR/k,1)^a*max(SCR/k,1)^-1.209*0.993^AGE

# Define fixed effect parameters
theta <- c(TVCL=6.93*(CKD_EPI/55)^0.817*(BW/70)^0.75,
          TVV2=43.1*(BW/70),
          TVQ=9.23*(BW/70)^0.75,
          TVV3=219*(BW/70),
          TVKA=0.766,
          TVF1=0.699,
          TLAG=0.331)

# Define between subject variability
omega <- lotri(eta.CL ~ 0.0893, eta.V2 ~ 0.13,
              eta.V3 ~ 1.07, eta.KA ~ 0.209, eta.F1 ~ 0.0275)

# Define unexplained variability
sigma <- lotri(prop.err.sd ~ 0.282^2, add.err.sd ~ 0.237^2)

```

```

# DOSE of GCV(iv) input -----
---
dose_gcv <- 5*BW # 5 mg/kg/12h

# Define event record
ev1 <- et(amount.units = "mg", time.units = "hours") %>%
  add.dosing(dosing.to = "centr",
             dose = dose_gcv, # mg
             rate = dose_gcv/1, # infusion for 1h
             nbr.doses = 14,
             dosing.interval = 12,
             start.time = 0) %>%
  # 0-12h after the last dose
  add.sampling(seq(from=156,to=168,by=1))

# Perform simulation
# total number of subject: 1000
sim1 <- rxSolve(mod1,theta,ev1,omega=omega,sigma=sigma,nSub=1000)

# Concentration
pk_gcv <- sim1 %>%
  group_by(time) %>%
  # 10-90% Prediction interval
  summarise(medconc = median(cp),
            lowconc = quantile(cp,0.1),
            highconc = quantile(cp, 0.9)) %>%
  ungroup() %>%
  # time after last dose
  mutate(tald = time-156)

dat1 <- pk_gcv %>%
  mutate(study="Lalagkas2023",
         drug="GCV",
         pop="adult")

# DOSE of VGCV(oral) input -----
---
dose_vgcv <- 900*0.72 # 900 mg/12h × 0.72 (the ratio between the
molecular weights of GCV and VGCV)

# Define event record
ev2 <- et(amount.units = "mg", time.units = "hours") %>%
  add.dosing(dosing.to = "depot",
             dose = dose_vgcv, # mg

```

```

        nbr.doses = 14,
        dosing.interval = 12,
        start.time = 0) %>%
# 0-12h after the last dose
add.sampling(seq(from=156,to=168,by=1))

# Perform simulation
# total number of subject: 1000
sim2 <- rxSolve(mod1,theta,ev2,omega=omega,sigma=sigma,nSub=1000)

# Concentration
pk_vgcv <- sim2 %>%
  group_by(time) %>%
  # 10-90% Prediction interval
  summarise(medconc = median(cp),
            lowconc = quantile(cp,0.1),
            highconc = quantile(cp, 0.9)) %>%
  ungroup() %>%
  # time after last dose
  mutate(tald = time-156)

dat2 <- pk_vgcv %>%
  mutate(study="Lalagkas2023",
         drug="VGCV",
         pop="adult")

```

## Nguyen et al.(2021)

```

# 2.##Nguyen et al.(2021)## -----
-----
# Define model -----
-----
# Ka = 0.506 (h-1)
# CL = 2.55 × (BW/11.7)^0.75 × (eGFR/167)^0.763 X 0.806^critically
ill (L/h)
# V2 = 5.96 × (BW/11.7) (L)
# Q = 0.222 × (BW/11.7)^0.75 (L/h)
# V3 = 1.29 × (BW/11.7) (L)
# F1 = 0.438
# BSV (CV%): CL = 48.6%, V2 = 46.9%
# prop.err = 0.477

```

```

# eGFR: estimated glomerular filtration rate (mL/min/1.73 m2); BW
(kg)

# Typical patient1: children(boys), 10 years
old, BW=30kg, HT=130cm, SCR=70umol/L
# Typical patient2:
neonates(boys), PMA=40weeks, HT=50cm, BW=3kg, SCR=30umol/L
# Typical patient3: infants(boys), 1 year
old, HT=70cm, BW=10kg, SCR=50umol/L
# eGFR = k*HT(cm)/SCR(mg/dL), calculated by Schwartz formula
# critically ill: 1 for critically ill patients and 0 for others,
choose 0
# Dose: GCV iv, 5 mg/kg/12h, inf=1h; VGCV oral, 10 mg/kg/12h

set.seed(123456)
rxSetSeed(123456)

mod2 <- rxode2({
  CL   = TVCL*exp(eta.CL);
  V2   = TVV2*exp(eta.V2);
  Q    = TVQ;
  V3   = TVV3;
  KA   = TVKA;
  F1   = TVF1;

  C2 = centr/V2;
  C3 = peri/V3;
  d/dt(depot) = -KA*depot;
  d/dt(centr) = F1*KA*depot - CL*C2 - Q*C2 + Q*C3;
  d/dt(peri)  = Q*C2 - Q*C3;

  cp = C2*(1 + prop.err.sd);
})

# Children -----
-----
# Define typical patient: children
BW <- 30 # kg
HT <- 130 # cm
SCR <- 70/88.4 # mg/dL (1mg/dL = 88.4umol/L)
k <- 0.55 # k = 0.55 for boys aged 2 years to less than 13 years
eGFR <- k*HT/SCR # ~90mL/min/1.73 m2, calculated by Schwartz formula

```

```

# Define fixed effect parameters
theta <- c(TVCL=2.55*((BW/11.7)^0.75)*(eGFR/167)^0.763*0.806^0,
          TVV2=5.96*(BW/11.7),
          TVQ=0.222*(BW/11.7)^0.75,
          TVV3=1.29*(BW/11.7),
          TVKA=0.506,
          TVF1=0.438)

# Define between subject variability
omega <- lotri(eta.CL ~ 0.486^2, eta.V2 ~ 0.469^2)

# Define unexplained variability
sigma <- lotri(prop.err.sd ~ 0.477^2)

# DOSE of GCV(iv) input -----
---
dose_gcv <- 5*BW # 5 mg/kg/12h for children

# Define event record
ev1 <- et(amount.units = "mg", time.units = "hours") %>%
  add.dosing(dosing.to = "centr",
            dose = dose_gcv, # mg
            rate = dose_gcv/1, # infusion for 1h
            nbr.doses = 14,
            dosing.interval = 12,
            start.time = 0) %>%
  # 0-12h after the last dose
  add.sampling(seq(from=156,to=168,by=1))

# Perform simulation
# total number of subject: 1000
sim1 <- rxSolve(mod2,theta,ev1,omega=omega,sigma=sigma,nSub=1000)

# Concentration
pk_gcv <- sim1 %>%
  group_by(time) %>%
  # 10-90% Prediction interval
  summarise(medconc = median(cp),
            lowconc = quantile(cp,0.1),
            highconc = quantile(cp, 0.9)) %>%
  ungroup() %>%
  # time after last dose
  mutate(tald = time-156)

```

```

dat3 <- pk_gcv %>%
  mutate(study="Nguyen2021",
         drug="GCV",
         pop="child")

# DOSE of VGCV(oral) input -----
---
dose_vgcv <- 10*BW # 10 mg/kg/12h for children

# Define event record
ev2 <- et(amount.units = "mg", time.units = "hours") %>%
  add.dosing(dosing.to = "depot",
            dose = dose_vgcv, # mg
            nbr.doses = 14,
            dosing.interval = 12,
            start.time = 0) %>%
  # 0-12h after the last dose
  add.sampling(seq(from=156,to=168,by=1))

# Perform simulation
# total number of subject: 1000
sim2 <- rxSolve(mod2,theta,ev2,omega=omega,sigma=sigma,nSub=1000)

# Concentration
pk_vgcv <- sim2 %>%
  group_by(time) %>%
  # 10-90% Prediction interval
  summarise(medconc = median(cp),
            lowconc = quantile(cp,0.1),
            highconc = quantile(cp, 0.9)) %>%
  ungroup() %>%
  # time after last dose
  mutate(tald = time-156)

# make the margin smooth by lowess
l0.1 <- lowess(pk_vgcv$tald, pk_vgcv$lowconc, f=0.35)
l0.5 <- lowess(pk_vgcv$tald, pk_vgcv$medconc, f=0.35)
l0.9 <- lowess(pk_vgcv$tald, pk_vgcv$highconc, f=0.35)

df0.1 <- data.frame(tald=l0.1$x,lowconc=l0.1$y)
df0.5 <- data.frame(tald=l0.5$x,medconc=l0.5$y)
df0.9 <- data.frame(tald=l0.9$x,highconc=l0.9$y)

vgcv_dat <- df0.1 %>%

```

```

left_join(df0.5,by="tald") %>%
left_join(df0.9,by="tald")

dat4 <- vgc_v_dat %>%
  mutate(study="Nguyen2021",
         drug="VGCV",
         pop="child")

# Neonates -----
-----
# Define typical patient: neonates
BW <- 3 # kg
HT <- 50 # cm
SCR <- 30/88.4 # mg/dL (1mg/dL = 88.4umol/L)
k <- 0.45 # k = 0.45 for subjects aged less than 2 years;
eGFR <- k*HT/SCR # ~ 66 mL/min/1.73 m2, calculated by Schwartz
formula

# Define fixed effect parameters
theta <- c(TVCL=2.55*((BW/11.7)^0.75)*(eGFR/167)^0.763*0.806^0,
          TVV2=5.98*(BW/11.7),
          TVQ=0.222*(BW/11.7)^0.75,
          TVV3=1.29*(BW/11.7),
          TVKA=0.506,
          TVF1=0.438)

# Define between subject variability
omega <- lotri(eta.CL ~ 0.486^2, eta.V2 ~ 0.469^2)

# Define unexplained variability
sigma <- lotri(prop.err.sd ~ 0.477^2)

# DOSE of GCV(iv) input -----
---
dose_gcv <- 5*BW # 5 mg/kg/12h for neonates

# Define event record
ev3 <- et(amount.units = "mg", time.units = "hours") %>%
  add.dosing(dosing.to = "centr",
            dose = dose_gcv, # mg
            rate = dose_gcv/1, # infusion for 1h
            nbr.doses = 14,
            dosing.interval = 12,

```

```

        start.time = 0) %>%
# 0-12h after the last dose
add.sampling(seq(from=156,to=168,by=1))

# Perform simulation
# total number of subject: 1000
sim3 <- rxSolve(mod2,theta,ev3,omega=omega,sigma=sigma,nSub=1000)

# Concentration
pk_gcv <- sim3 %>%
  group_by(time) %>%
  # 10-90% Prediction interval
  summarise(medconc = median(cp),
            lowconc = quantile(cp,0.1),
            highconc = quantile(cp, 0.9)) %>%
  ungroup() %>%
  # time after last dose
  mutate(tald = time-156)

dat5 <- pk_gcv %>%
  mutate(study="Nguyen2021",
         drug="GCV",
         pop="neonate")

# DOSE of VGCV(oral) input -----
---
dose_vgcv <- 10*BW # 10 mg/kg/12h for neonates

# Define event record
ev4 <- et(amount.units = "mg", time.units = "hours") %>%
  add.dosing(dosing.to = "depot",
            dose = dose_vgcv, # mg
            nbr.doses = 14,
            dosing.interval = 12,
            start.time = 0) %>%
  # 0-12h after the last dose
  add.sampling(seq(from=156,to=168,by=1))

# Perform simulation
# total number of subject: 1000
sim4 <- rxSolve(mod2,theta,ev4,omega=omega,sigma=sigma,nSub=1000)

# Concentration

```



```

pk_vgcv <- sim4 %>%
  group_by(time) %>%
  # 10-90% Prediction interval
  summarise(medconc = median(cp),
            lowconc = quantile(cp, 0.1),
            highconc = quantile(cp, 0.9)) %>%
  ungroup() %>%
  # time after last dose
  mutate(tald = time-156)

dat6 <- pk_vgcv %>%
  mutate(study="Nguyen2021",
         drug="VGCV",
         pop="neonate")

# Infants -----
-----
# Define typical patient: infants
BW <- 10 # kg
HT <- 70 # cm
SCR <- 50/88.4 # mg/dL (1mg/dL = 88.4umol/L)
k <- 0.45 # k = 0.45 for subjects aged less than 2 years;
eGFR <- k*HT/SCR # ~ 55.7 mL/min/1.73 m2, calculated by Schwartz
formula

# Define fixed effect parameters
theta <- c(TVCL=2.55*((BW/11.7)^0.75)*(eGFR/167)^0.763*0.806^0,
          TVV2=5.98*(BW/11.7),
          TVQ=0.222*(BW/11.7)^0.75,
          TVV3=1.29*(BW/11.7),
          TVKA=0.506,
          TVF1=0.438)

# Define between subject variability
omega <- lotri(eta.CL ~ 0.486^2, eta.V2 ~ 0.469^2)

# Define unexplained variability
sigma <- lotri(prop.err.sd ~ 0.477^2)

# DOSE of GCV(iv) input -----
---
dose_gcv <- 5*BW # 5 mg/kg/12h for infants

```

```

# Define event record
ev5 <- et(amount.units = "mg", time.units = "hours") %>%
  add.dosing(dosing.to = "centr",
             dose = dose_gcv, # mg
             rate = dose_gcv/1, # infusion for 1h
             nbr.doses = 14,
             dosing.interval = 12,
             start.time = 0) %>%
  # 0-12h after the last dose
  add.sampling(seq(from=156,to=168,by=1))

# Perform simulation
# total number of subject: 1000
sim5 <- rxSolve(mod2,theta,ev5,omega=omega,sigma=sigma,nSub=1000)

# Concentration
pk_gcv <- sim5 %>%
  group_by(time) %>%
  # 10-90% Prediction interval
  summarise(medconc = median(cp),
            lowconc = quantile(cp,0.1),
            highconc = quantile(cp, 0.9)) %>%
  ungroup() %>%
  # time after last dose
  mutate(tald = time-156)

dat7 <- pk_gcv %>%
  mutate(study="Nguyen2021",
         drug="GCV",
         pop="infant")

# DOSE of VGCV(oral) input -----
---
dose_vgcv <- 10*BW # 10 mg/kg/12h for infants

# Define event record
ev6 <- et(amount.units = "mg", time.units = "hours") %>%
  add.dosing(dosing.to = "depot",
             dose = dose_vgcv, # mg
             nbr.doses = 14,
             dosing.interval = 12,
             start.time = 0) %>%
  # 0-12h after the last dose

```

```

add.sampling(seq(from=156,to=168,by=1))

# Perform simulation
# total number of subject: 1000
sim6 <- rxSolve(mod2,theta,ev6,omega=omega,sigma=sigma,nSub=1000)

# Concentration
pk_vgcv <- sim6 %>%
  group_by(time) %>%
  # 10-90% Prediction interval
  summarise(medconc = median(cp),
            lowconc = quantile(cp,0.1),
            highconc = quantile(cp, 0.9)) %>%
  ungroup() %>%
  # time after last dose
  mutate(tald = time-156)

dat8 <- pk_vgcv %>%
  mutate(study="Nguyen2021",
         drug="VGCV",
         pop="infant")

```

### Franck et al.(2021)

```

# 3.##Franck et al.(2021)## -----
-----
# Define model -----
-----
# CL   = 6.9 × (BW/26.7)0.75 × (CrCL/149.8)0.88 (L/h)
# V2   = 9.7 × (BW/26.7) (L)
# Q    = 10.9 (L/h)
# V3   = 7.6 × (BW/26.7) (L)
# Ka   = 0.73 (h-1)
# F1   = 0.43
# Tlag = 0.33 (h)

# BSV (CV%): CL = 66.3%, V2 = 76.8%, Ka = 83.7%, F1 = 55.7%,
# add.err = 0.98 mg/L
# CrCL: creatinine clearance (mL/min/1.73 m2); BW (kg)

# Typical patient1: children(boys),10 years old,BW=30kg,SCR=70umol/L

```

```

# Typical patient2: infants(boys),1 year
old,HT=70cm,BW=10kg,SCR=50umol/L
# Dose: GCV iv, 5 mg/kg/12h, infusion=1h; VGCV oral, 10 mg/kg/12h

set.seed(1234)
rxSetSeed(1234)

mod3 <- rxode2({
  CL   = TVCL*exp(eta.CL);
  V2   = TVV2*exp(eta.V2);
  Q    = TVQ;
  V3   = TVV3;
  KA   = TVKA*exp(eta.KA);
  F1   = TVF1*exp(eta.F1);

  C2 = centr/V2;
  C3 = peri/V3;
  d/dt(depot) = -KA*depot;
  d/dt(centr) = F1*KA*depot - CL*C2 - Q*C2 + Q*C3;
  d/dt(peri) = Q*C2 - Q*C3;
  alag(depot) = TLAG;

  cp = C2 + add.err.sd;
})

# Children -----
-----
# Define typical patient: children
BW <- 30 # kg
HT <- 130 # cm
SCR <- 70/88.4 # mg/dL (1mg/dL = 88.4umol/L)
k <- 0.55 # k = 0.55 for boys aged 2 years to less than 13 years
CrCL <- k*HT/SCR # ~90mL/min/1.73 m2, calculated by modified Schwartz
formula

# Define fixed effect parameters
theta <- c(TVCL=6.9*((BW/26.7)^0.75)*((CrCL/149.8)^0.88),
          TVV2=9.7*(BW/26.7),
          TVQ =10.9,
          TVV3=7.6*(BW/26.7),
          TVKA=0.73,
          TVF1=0.43,
          TLAG=0.33)

```

```

# Define between subject variability
omega <- lotri(eta.CL ~ 0.663^2, eta.V2 ~ 0.768^2,
              eta.KA ~ 0.837^2, eta.F1 ~ 0.557^2)

# Define unexplained variability
sigma <- lotri(add.err.sd ~ 0.98^2)

# DOSE of GCV(iv) input -----
---
dose_gcv <- 5*BW # 5 mg/kg/12h for children

# Define event record
ev1 <- et(amount.units = "mg", time.units = "hours") %>%
  add.dosing(dosing.to = "centr",
            dose = dose_gcv, # mg
            rate = dose_gcv/1, # infusion for 1h
            nbr.doses = 14,
            dosing.interval = 12,
            start.time = 0) %>%
  # 0-12h after the last dose
  add.sampling(seq(from=156,to=168,by=1))

# Perform simulation
# total number of subject: 1000
sim1 <- rxSolve(mod3,theta,ev1,omega=omega,sigma=sigma,nSub=1000)

# Concentration
pk_gcv <- sim1 %>%
  group_by(time) %>%
  # 10-90% Prediction interval
  summarise(medconc = median(cp),
            lowconc = quantile(cp,0.1),
            highconc = quantile(cp, 0.9)) %>%
  ungroup() %>%
  # time after last dose
  mutate(tald = time-156)

# make the margin smooth by lowess
10.1 <- lowess(pk_gcv$tald, pk_gcv$lowconc, f=0.35)
10.5 <- lowess(pk_gcv$tald, pk_gcv$medconc, f=0.35)
10.9 <- lowess(pk_gcv$tald, pk_gcv$highconc, f=0.35)

```

```

df0.1 <- data.frame(tald=10.1$x,lowconc=10.1$y)
df0.5 <- data.frame(tald=10.5$x,medconc=10.5$y)
df0.9 <- data.frame(tald=10.9$x,highconc=10.9$y)

gcv_dat <- df0.1 %>%
  left_join(df0.5,by="tald") %>%
  left_join(df0.9,by="tald")

dat9 <- pk_gcv %>%
  mutate(study="Franck2021",
         drug="GCV",
         pop="child")

# DOSE of VGCV(oral) input -----
---
dose_vgcv <- 10*BW # 10 mg/kg/12h for children

# Define event record
ev2 <- et(amount.units = "mg", time.units = "hours") %>%
  add.dosing(dosing.to = "depot",
            dose = dose_vgcv, # mg
            nbr.doses = 14,
            dosing.interval = 12,
            start.time = 0) %>%
  # 0-12h after the last dose
  add.sampling(seq(from=156,to=168.33,by=1))

# Perform simulation
# total number of subject: 1000
sim2 <- rxSolve(mod3,theta,ev2,omega=omega,sigma=sigma,nSub=1000)

# Concentration
pk_vgcv <- sim2 %>%
  group_by(time) %>%
  # 10-90% Prediction interval
  summarise(medconc = median(cp),
            lowconc = quantile(cp,0.1),
            highconc = quantile(cp, 0.9)) %>%
  ungroup() %>%
  # time after last dose
  mutate(tald = time-156)

dat10 <- pk_vgcv %>%

```

```

mutate(study="Franck2021",
       drug="VGCV",
       pop="child")

# Infants -----
-----

# Define typical patient: children
BW <- 10 # kg
HT <- 70 # cm
SCR <- 50/88.4 # mg/dL (1mg/dL = 88.4umol/L)
k <- 0.45 # k = 0.45 for subjects aged less than 2 years;
CrCL <- k*HT/SCR # ~ 55.7 mL/min/1.73 m2, calculated by modified
Schwartz formula

# Define fixed effect parameters
theta <- c(TVCL=6.9*((BW/26.7)^0.75)*((CrCL/149.8)^0.88),
          TVV2=9.7*(BW/26.7),
          TVQ =10.9,
          TVV3=7.6*(BW/26.7),
          TVKA=0.73,
          TVF1=0.43,
          TLAG=0.33)

# Define between subject variability
omega <- lotri(eta.CL ~ 0.663^2, eta.V2 ~ 0.768^2,
              eta.KA ~ 0.837^2, eta.F1 ~ 0.557^2)

# Define unexplained variability
sigma <- lotri(add.err.sd ~ 0.98^2)

# DOSE of GCV(iv) input -----
----

dose_gcv <- 5*BW # 5 mg/kg/12h for children

# Define event record
ev3 <- et(amount.units = "mg", time.units = "hours") %>%
  add.dosing(dosing.to = "centr",
            dose = dose_gcv, # mg
            rate = dose_gcv/1, # infusion for 1h
            nbr.doses = 14,
            dosing.interval = 12,
            start.time = 0) %>%
  # 0-12h after the last dose

```

```

add.sampling(seq(from=156,to=168,by=1))

# Perform simulation
# total number of subject: 1000
sim3 <- rxSolve(mod3,theta,ev3,omega=omega,sigma=sigma,nSub=1000)

# Concentration
pk_gcv <- sim3 %>%
  group_by(time) %>%
  # 10-90% Prediction interval
  summarise(medconc = median(cp),
            lowconc = quantile(cp,0.1),
            highconc = quantile(cp, 0.9)) %>%
  ungroup() %>%
  # time after last dose
  mutate(tald = time-156)

# make the margin smooth by lowess
l0.1 <- lowess(pk_gcv$tald, pk_gcv$lowconc, f=0.35)
l0.5 <- lowess(pk_gcv$tald, pk_gcv$medconc, f=0.35)
l0.9 <- lowess(pk_gcv$tald, pk_gcv$highconc, f=0.35)

df0.1 <- data.frame(tald=l0.1$x,lowconc=l0.1$y)
df0.5 <- data.frame(tald=l0.5$x,medconc=l0.5$y)
df0.9 <- data.frame(tald=l0.9$x,highconc=l0.9$y)

gcv_dat <- df0.1 %>%
  left_join(df0.5,by="tald") %>%
  left_join(df0.9,by="tald")

dat11 <- pk_gcv %>%
  mutate(study="Franck2021",
         drug="GCV",
         pop="infant")

# DOSE of VGCV(oral) input -----
---
dose_vgcv <- 10*BW # 10 mg/kg/12h for children

# Define event record
ev4 <- et(amount.units = "mg", time.units = "hours") %>%
  add.dosing(dosing.to = "depot",
            dose = dose_vgcv, # mg
            nbr.doses = 14,

```



```

        dosing.interval = 12,
        start.time = 0) %>%
# 0-12h after the last dose
add.sampling(seq(from=156,to=168.33,by=1))

# Perform simulation
# total number of subject: 1000
sim4 <- rxSolve(mod3,theta,ev4,omega=omega,sigma=sigma,nSub=1000)

# Concentration
pk_vgcv <- sim4 %>%
  group_by(time) %>%
  # 10-90% Prediction interval
  summarise(medconc = median(cp),
            lowconc = quantile(cp,0.1),
            highconc = quantile(cp, 0.9)) %>%
  ungroup() %>%
  # time after last dose
  mutate(tald = time-156)

dat12 <- pk_vgcv %>%
  mutate(study="Franck2021",
         drug="VGCV",
         pop="infant")

```

### Chen et al.(2021)

```

# 4.##Chen et al.(2021)## -----
-----
# Define model -----
-----
# CL/F =  $7.09 \times (1 + \text{CLcr}/68.3 \times 1.08)$  (L/h)
# V2/F = 10.8 (L)
# Q/F = 3.98 (L/h)
# V3/F = 174 (L)
# Ka = 0.23 (h-1)
# Tlag = 0.93 (h)

# BSV (CV%): CL/F = 27.2%, V2/F = 153%, Q/F = 63.1%, V3/F = 107%
# RUV: exponential.err = 42.9%
# CLcr: creatinine clearance (mL/min), calculated by C-G formula

# Typical patient: adult(male),40 years old,BW=70kg,SCR=95umol/L

```

```

# Dose: VGCV oral, 900 mg/12h (according to the drug label for
treatment)

set.seed(12345)
rxSetSeed(12345)

mod4 <- rxode2({
  CL  = TVCL*exp(eta.CL);
  V2  = TVV2*exp(eta.V2);
  Q   = TVQ*exp(eta.Q);
  V3  = TVV3*exp(eta.V3);
  KA  = TVKA;

  C2 = centr/V2;
  C3 = peri/V3;
  d/dt(depot) = -KA*depot;
  d/dt(centr) = KA*depot - CL*C2 - Q*C2 + Q*C3;
  d/dt(peri)  = Q*C2 - Q*C3;
  alag(depot) = TLAG;

  cp = C2*exp(expo.err.sd);
})

# Adults -----
-----
# Define typical patient: adults
BW <- 70 # kg
AGE <- 40 # years old
SCR <- 95/88.4 # mg/dL (1mg/dL = 88.4umol/L)
CLcr <- ((140-AGE)*BW)/(72*SCR) # ~90mL/min, calculated by C-G
formula

# Define fixed effect parameters
theta <- c(TVCL=7.09*(1 + (CLcr/68.3)*1.08),
          TVV2=10.8,
          TVQ =3.98,
          TVV3=174,
          TVKA=0.23,
          TLAG=0.93)

# Define between subject variability
omega <- lotri(eta.CL ~ 0.272^2, eta.V2 ~ 1.53^2,
              eta.Q ~ 0.631^2, eta.V3 ~ 1.07^2)

```

```

# Define unexplained variability
sigma <- lotri(expo.err.sd ~ 0.429^2)

# DOSE of VGCV(oral) input -----
---
dose_vgcv <- 900 # 900 mg/12h for adults

# Define event record
ev1 <- et(amount.units = "mg", time.units = "hours") %>%
  add.dosing(dosing.to = "depot",
            dose = dose_vgcv, # mg
            nbr.doses = 14,
            dosing.interval = 12,
            start.time = 0) %>%
  # 0-12h after the last dose
  add.sampling(seq(from=156,to=168.93,by=1))

# Perform simulation
# total number of subject: 1000
sim1 <- rxSolve(mod4,theta,ev1,omega=omega,sigma=sigma,nSub=1000)

# Concentration
pk_vgcv <- sim1 %>%
  group_by(time) %>%
  # 10-90% Prediction interval
  summarise(medconc = median(cp),
            lowconc = quantile(cp,0.1),
            highconc = quantile(cp, 0.9)) %>%
  ungroup() %>%
  # time after last dose
  mutate(tald = time-156)

dat13 <- pk_vgcv %>%
  mutate(study="Chen2021",
         drug="VGCV",
         pop="adult")

```

**Li et al.(2021)**

```

# 5.##Li et al.(2021)## -----
-----

```

```

# Define model -----
-----
# CL = 5.23 x KF^0.92 x (BW/12)^1.02 (L/h)
# V = 11.35 x (BW/12)^0.8 (L)
# BSV (CV%): CL = 12.9%, V = 65.8%
# prop.err = 0.0823
# KF: kidney function (mL/min/1.73m2), KF=eGFR/(120mL/min/1.73m2); BW
(kg)

# Typical patient1: children(boys),10 years
old,HT=130cm,BW=30kg,SCR=70umol/L
# Typical patient2: infants(boys),1 year
old,HT=70cm,BW=10kg,SCR=50umol/L
# Dose: GCV iv, 5 mg/kg/12h, infusion=1h

set.seed(123456)
rxSetSeed(123456)

mod5 <- rxode2({
  CL = TVCL*exp(eta.CL);
  V = TVV*exp(eta.V);

  C = centr/V;
  d/dt(centr) = -CL*C;

  cp = C*(1 + prop.err.sd);
})

# Children -----
-----
# Define typical patient: children
BW <- 30 # kg
HT <- 130 # cm
SCR <- 70/88.4 # mg/dL (1mg/dL = 88.4umol/L)
AGE <- 10 # years
eGFR <- 0.68*(HT/SCR)-0.0008*(HT/SCR)^2+0.48*AGE-25.68 # ~ 70
mL/min/1.73 m2, calculated by Gao formula for male
KF <- eGFR/120 # mL/min/1.73 m2

# Define fixed effect parameters
theta <- c(TVCL=5.23*KF^0.92*(BW/12)^1.02,
          TVV=11.35*(BW/12)^0.8)

```

```

# Define between subject variability
omega <- lotri(eta.CL ~ 0.129^2, eta.V ~ 0.658^2)

# Define unexplained variability
sigma <- lotri(prop.err.sd ~ 0.0823^2)

# DOSE of GCV(iv) input -----
---
dose_gcv <- 5*BW # 5 mg/kg/12h for children

# Define event record
ev1 <- et(amount.units = "mg", time.units = "hours") %>%
  add.dosing(dosing.to = "centr",
            dose = dose_gcv, # mg
            rate = dose_gcv/1, # infusion for 1h
            nbr.doses = 14,
            dosing.interval = 12,
            start.time = 0) %>%
  # 0-12h after the last dose
  add.sampling(seq(from=156,to=168,by=1))

# Perform simulation
# total number of subject: 1000
sim1 <- rxSolve(mod5,theta,ev1,omega=omega,sigma=sigma,nSub=1000)

# Concentration
pk_gcv <- sim1 %>%
  group_by(time) %>%
  # 10-90% Prediction interval
  summarise(medconc = median(cp),
            lowconc = quantile(cp,0.1),
            highconc = quantile(cp, 0.9)) %>%
  ungroup() %>%
  # time after last dose
  mutate(tald = time-156)

dat14 <- pk_gcv %>%
  mutate(study="Li2021",
        drug="GCV",
        pop="child")

# Infants -----
-----

```

```

# Define typical patient: children
BW <- 10 # kg
HT <- 70 # cm
SCR <- 50/88.4 # mg/dL (1mg/dL = 88.4umol/L)
AGE <- 1 # year
eGFR <- 0.68*(HT/SCR)-0.0008*(HT/SCR)^2+0.48*AGE-25.68 # ~ 46
mL/min/1.73 m2, calculated by Gao formula for male
KF <- eGFR/120 # mL/min/1.73 m2

# Define fixed effect parameters
theta <- c(TVCL=5.23*KF^0.92*(BW/12)^1.02,
          TVV=11.35*(BW/12)^0.8)

# Define between subject variability
omega <- lotri(eta.CL ~ 0.129^2, eta.V ~ 0.658^2)

# Define unexplained variability
sigma <- lotri(prop.err.sd ~ 0.0823^2)

# DOSE of GCV(iv) input -----
---
dose_gcv <- 5*BW # 5 mg/kg/12h for children

# Define event record
ev2 <- et(amount.units = "mg", time.units = "hours") %>%
  add.dosing(dosing.to = "centr",
            dose = dose_gcv, # mg
            rate = dose_gcv/1, # infusion for 1h
            nbr.doses = 14,
            dosing.interval = 12,
            start.time = 0) %>%
  # 0-12h after the last dose
  add.sampling(seq(from=156,to=168,by=1))

# Perform simulation
# total number of subject: 1000
sim2 <- rxSolve(mod5,theta,ev2,omega=omega,sigma=sigma,nSub=1000)

# Concentration
pk_gcv <- sim2 %>%
  group_by(time) %>%
  # 10-90% Prediction interval
  summarise(medconc = median(cp),

```

```

        lowconc = quantile(cp, 0.1),
        highconc = quantile(cp, 0.9)) %>%
ungroup() %>%
# time after last dose
mutate(tald = time-156)

dat15 <- pk_gcv %>%
  mutate(study="Li2021",
         drug="GCV",
         pop="infant")

```

### Krens et al.(2020)

```

# 6.##Krens et al.(2020)## -----
-----
# Define model -----
-----
# CL = 2.3 x (CKD_EPI/65)^0.71 (L/h)
# V = 42 (L)
# BSV (CV%): CL = 47%, V = 80%
# prop.err = 0.43
# CKD_EPI: eGFR calculated by CKD-EPI equation (mL/min/1.73m2)
# GFR=141*((SCR/0.9)^-1.209)*0.993^AGE=141*((95/88.4)/0.9)^-
1.209)*0.993^40=85.91mL/min/1.73m2

# Typical patient: adult(male),40 years
old,BW=70kg,SCR=95umol/L,CKD_EPI=86mL/min/1.73m2
# Dose: GCV iv, 5 mg/kg/12h,infusion=1h

set.seed(12345)
rxSetSeed(12345)

mod6 <- rxode2({
  CL = TVCL*exp(eta.CL);
  V = TVV*exp(eta.V);

  C = centr/V;
  d/dt(centr) = -CL*C;

  cp = C*(1 + prop.err.sd);
})

```

```

# Adults -----
-----
# Define typical patient: adults
BW <- 70 # kg
AGE <- 40 # years old
SCR <- 95/88.4 # mg/dL (1mg/dL = 88.4umol/L)
CKD_EPI <- 141*((SCR/0.9)^-1.209)*0.993^AGE # mL/min/1.73 m2

# Define fixed effect parameters
theta <- c(TVCL=2.3*(CKD_EPI/65)^0.71,
          TVV=42)

# Define between subject variability
omega <- lotri(eta.CL ~ 0.47^2, eta.V ~ 0.8^2)

# Define unexplained variability
sigma <- lotri(prop.err.sd ~ 0.43^2)

# DOSE of GCV(iv) input -----
---
dose_gcv <- 5*BW # 5 mg/kg/12h for adults

# Define event record
ev1 <- et(amount.units = "mg", time.units = "hours") %>%
  add.dosing(dosing.to = "centr",
            dose = dose_gcv, # mg
            rate = dose_gcv/1, # infusion for 1h
            nbr.doses = 14,
            dosing.interval = 12,
            start.time = 0) %>%
  # 0-12h after the last dose
  add.sampling(seq(from=156,to=168,by=1))

# Perform simulation
# total number of subject: 1000
sim1 <- rxSolve(mod6,theta,ev1,omega=omega,sigma=sigma,nSub=1000)

# Concentration
pk_gcv <- sim1 %>%
  group_by(time) %>%
  # 10-90% Prediction interval
  summarise(medconc = median(cp),
            lowconc = quantile(cp,0.1),
            highconc = quantile(cp, 0.9)) %>%

```



```

ungroup() %>%
# time after last dose
mutate(tald = time-156)

dat16 <- pk_gcv %>%
  mutate(study="Krens2020",
         drug="GCV",
         pop="adult")

```

### Facchin et al.(2019)

```

# 7.##Facchin et al.(2019)## -----
-----
# Define model -----
-----
# CL/F =  $9.07 \times (\text{SCR}/72.5)^{-0.768} \times \text{BSA}^{1.31} \times 1.15^{\text{GENDER}}$  (L/h)
# V2/F =  $45 \times \text{BSA}^{1.28} \times 1.14^{\text{GENDER}}$  (L)
# Q/F = 1.46 (L/h)
# V3/F = 18.5 (L)
# Ka = 6.96 (h-1)
# Tlag = 0.86 (h)

# BSV (CV%): CL/F = 16.0%, V2/F = 9.3%, V3/F = 54.6%, Ka = 59.2%
# IOV (%): IOV.CL = 14.4%, IOV.V3 = 77.2%, IOV.KA = 111.4%
# RUV: prop.err = 23.5%
# SCR: serum creatinine level (umol/L); BSA: body surface area (m2);
# GENDER: 1 for male and 0 for female

# 1. Typical patient: children(boys), 10 years
old, BW=30kg, HT=130cm, SCR=70umol/L
# Dose: VGCV oral, 10 mg/kg/12h

# 2. Typical patient: adults(male), 40 years
old, BW=70kg, HT=170cm, SCR=95umol/L
# Dose: VGCV oral, 900 mg/12h (according to the drug label for
treatment)

set.seed(123456)
rxSetSeed(123456)

mod7 <- rxode2({

```

```

CL   = TVCL*exp(eta.CL + iov.CL);
V2   = TVV2*exp(eta.V2);
Q     = TVQ;
V3   = TVV3*exp(eta.V3 + iov.V3);
KA   = TVKA*exp(eta.KA + iov.KA);

C2 = centr/V2;
C3 = peri/V3;
d/dt(depot) = -KA*depot;
d/dt(centr) = KA*depot - CL*C2 - Q*C2 + Q*C3;
d/dt(peri) = Q*C2 - Q*C3;
alag(depot) = TLAG;

cp = C2*(1 + prop.err.sd);
})

# Children -----
# Define typical patient: children
BW <- 30 # kg
HT <- 130 # cm
AGE <- 10 # years old
SCR <- 70 # umol/L
BSA <- sqrt((HT*BW)/3600) # m2
GENDER <- 1 # 1 for male and 0 for female

# Define fixed effect parameters
theta <- c(TVCL=9.07*((SCR/72.5)^(-0.768))*(BSA^1.31)*(1.15^GENDER),
           TVV2=45*(BSA^1.28)*(1.14^GENDER),
           TVQ =1.46,
           TVV3=18.5,
           TVKA=6.96,
           TLAG=0.86)

# Define between subject variability
omega <- lotri(eta.CL ~ 0.16^2, eta.V2 ~ 0.093^2,
              eta.V3 ~ 0.546^2, eta.KA ~ 0.592^2,
              iov.CL ~ 0.144^2, iov.V3 ~ 0.772^2, iov.KA ~ 1.114^2)

# Define unexplained variability
sigma <- lotri(prop.err.sd ~ 0.235^2)

dose_vgcv <- 10*BW # 10 mg/kg/12h for children

```

```

# Define event record
ev1 <- et(amount.units = "mg", time.units = "hours") %>%
  add.dosing(dosing.to = "depot",
            dose = dose_vgcv, # mg
            nbr.doses = 14,
            dosing.interval = 12,
            start.time = 0) %>%
  # 0-12h after the last dose
  add.sampling(seq(from=156,to=168.86,by=1))

# Perform simulation
# total number of subject: 1000
sim1 <- rxSolve(mod7,theta,ev1,omega=omega,sigma=sigma,nSub=1000)

# Concentration
pk_vgcv <- sim1 %>%
  group_by(time) %>%
  # 10-90% Prediction interval
  summarise(medconc = median(cp),
            lowconc = quantile(cp,0.1),
            highconc = quantile(cp, 0.9)) %>%
  ungroup() %>%
  # time after last dose
  mutate(tald = time-156)

dat17 <- pk_vgcv %>%
  mutate(study="Facchin2019",
        drug="VGCV",
        pop="child")

# Adults -----
# Define typical patient: adults
BW <- 70 # kg
HT <- 170 # cm
AGE <- 40 # years old
SCR <- 95 # mg/dL (1mg/dL = 88.4umol/L)
BSA <- sqrt((HT*BW)/3600) # m2
GENDER <- 1 # 1 for male and 0 for female

# Define fixed effect parameters
theta <- c(TVCL=9.07*((SCR/72.5)^(-0.768))*(BSA^1.31)*(1.15^GENDER),

```

```

TVV2=45*(BSA^1.28)*(1.14^GENDER),
TVQ =1.46,
TVV3=18.5,
TVKA=6.96,
TLAG=0.86)

# Define between subject variability
omega <- lotri(eta.CL ~ 0.16^2, eta.V2 ~ 0.093^2,
              eta.V3 ~ 0.546^2, eta.KA ~ 0.592^2,
              iov.CL ~ 0.144^2, iov.V3 ~ 0.772^2, iov.KA ~ 1.114^2)

# Define unexplained variability
sigma <- lotri(prop.err.sd ~ 0.235^2)

dose_vgcv <- 900 # 900 mg/12h for adults

# Define event record
ev2 <- et(amount.units = "mg", time.units = "hours") %>%
  add.dosing(dosing.to = "depot",
            dose = dose_vgcv, # mg
            nbr.doses = 14,
            dosing.interval = 12,
            start.time = 0) %>%
  # 0-12h after the last dose
  add.sampling(seq(from=156,to=168.86,by=1))

# Perform simulation
# total number of subject: 1000
sim2 <- rxSolve(mod7,theta,ev2,omega=omega,sigma=sigma,nSub=1000)

# Concentration
pk_vgcv <- sim2 %>%
  group_by(time) %>%
  # 10-90% Prediction interval
  summarise(medconc = median(cp),
            lowconc = quantile(cp,0.1),
            highconc = quantile(cp, 0.9)) %>%
  ungroup() %>%
  # time after last dose
  mutate(tald = time-156)

dat18 <- pk_vgcv %>%

```

```
mutate(study="Facchin2019",
       drug="VGCV",
       pop="adult")
```

### Horvatits et al.(2014)

```
# 8.##Horvatits et al.(2014)## -----
-----
# Define model -----
-----
# CL = 2.2 (L/h)
# V1 = 32.4 (L)
# Q = 16.8 (L/h)
# V2 = 33.5 (L)
# BSV (CV%): CL = 61.5%, V1 = 33.6%, Q = 34.7%, V2 = 60.6%
# prop.err = 7.22%

# Typical patient: adults(male),40 years old,BW=70kg,SCR=95umol/L
# Dose: GCV iv, 5 mg/kg/12h, infusion=1h

set.seed(12345)
rxSetSeed(12345)

mod8 <- rxode2({
  CL = TVCL*exp(eta.CL);
  V1 = TVV1*exp(eta.V1);
  Q = TVQ*exp(eta.Q);
  V2 = TVV2*exp(eta.V2);

  C1 = centr/V1;
  C2 = peri/V2
  d/dt(centr) = - CL*C1 - Q*C1 + Q*C2;
  d/dt(peri) = Q*C1 - Q*C2;

  cp = C1*(1 + prop.err.sd);
})

# Adults -----
-----
# Define typical patient: adults
BW <- 70 # kg
AGE <- 40 # years old
SCR <- 95/88.4 # mg/dL (1mg/dL = 88.4umol/L)
```

```

# Define fixed effect parameters
theta <- c(TVCL=2.2, TVV1=32.4, TVQ=16.8, TVV2=33.5)

# Define between subject variability
omega <- lotri(eta.CL ~ 0.615^2, eta.V1 ~ 0.336^2,
              eta.Q ~ 0.347^2, eta.V2 ~ 0.606^2)

# Define unexplained variability
sigma <- lotri(prop.err.sd ~ 0.0722^2)

# DOSE of GCV(iv) input -----
---
dose_gcv <- 5*BW # 5 mg/kg/12h for adults

# Define event record
ev1 <- et(amount.units = "mg", time.units = "hours") %>%
  add.dosing(dosing.to = "centr",
            dose = dose_gcv, # mg
            rate = dose_gcv/1, # infusion for 1h
            nbr.doses = 14,
            dosing.interval = 12,
            start.time = 0) %>%
  # 0-12h after the last dose
  add.sampling(seq(from=156,to=168,by=1))

# Perform simulation
# total number of subject: 1000
sim1 <- rxSolve(mod8,theta,ev1,omega=omega,sigma=sigma,nSub=1000)

# Concentration
pk_gcv <- sim1 %>%
  group_by(time) %>%
  # 10-90% Prediction interval
  summarise(medconc = median(cp),
            lowconc = quantile(cp,0.1),
            highconc = quantile(cp, 0.9)) %>%
  ungroup() %>%
  # time after last dose
  mutate(tald = time-156)

dat19 <- pk_gcv %>%

```

```
mutate(study="Horvatits2014",
       drug="GCV",
       pop="adult")
```

### Vezina et al.(2014)

```
# 9.##Vezina et al.(2014)## -----
-----
# Define model -----
-----
# CL/F = 14.5 × ((CLcr/60) × (70/BW))^0.492 × (BW/70)^0.75 (L/h)
# V2/F = 87.5 × (BW/70) (L)
# Q/F = 4.8 × (BW/70)^0.75 (L/h)
# V3/F = 42.6 × (BW/70) (L)
# Ka = 3 (h-1)
# Tlag = 0.5 (h)

# BSV (CV%): CL/F = 33.5%
# RUV: prop.err = 32.7%
# CLcr: creatinine clearance, calculated by C-G method for adults and
Schwartz formula for children

# 1. Typical patient: children(boys), 10 years
old, BW=30kg, HT=130cm, SCR=70umol/L
# Dose: VGCV oral, 10 mg/kg/12h

# 2. Typical patient: adults(male), 40 years
old, BW=70kg, HT=170cm, SCR=95umol/L
# Dose: VGCV oral, 900 mg/12h (according to the drug label for
treatment)

# 3. Typical patient: infants(boys), 1 year
old, BW=10kg, HT=70cm, SCR=50umol/L
# Dose: VGCV oral, 10 mg/kg/12h

set.seed(123456)
rxSetSeed(123456)

mod9 <- rxode2({
  CL = TVCL*exp(eta.CL);
  V2 = TVV2;
  Q = TVQ;
```

```

V3    = TVV3;
KA    = TVKA;

C2 = centr/V2;
C3 = peri/V3;
d/dt(depot) = -KA*depot;
d/dt(centr) = KA*depot - CL*C2 - Q*C2 + Q*C3;
d/dt(peri)  = Q*C2 - Q*C3;
alag(depot) = TLAG;

cp = C2*(1 + prop.err.sd);
})

# Children -----
# Define typical patient: children
BW <- 30 # kg
HT <- 130 # cm
AGE <- 10 # years old
SCR <- 70/88.4 # mg/dL (1mg/dL = 88.4umol/L)
k <- 0.55 # k = 0.55 for boys aged 2 years to less than 13 years
CLcr <- k*HT/SCR # ~90mL/min/1.73 m2, calculated by modified Schwartz
formula for children

# Define fixed effect parameters
theta <- c(TVCL=14.5*((CLcr/60)*(70/BW))^0.492*(BW/70)^0.75,
          TVV2=87.5*(BW/70),
          TVQ =4.8*(BW/70)^0.75 ,
          TVV3=42.6*(BW/70),
          TVKA=3,
          TLAG=0.5)

# Define between subject variability
omega <- lotri(eta.CL ~ 0.335^2)

# Define unexplained variability
sigma <- lotri(prop.err.sd ~ 0.327^2)

dose_vgcv <- 10*BW # 10 mg/kg/12h for children

# Define event record
ev1 <- et(amount.units = "mg", time.units = "hours") %>%
  add.dosing(dosing.to = "depot",

```



```

        dose = dose_vgcv, # mg
        nbr.doses = 14,
        dosing.interval = 12,
        start.time = 0) %>%
# 0-12h after the last dose
add.sampling(seq(from=156,to=168.5,by=1))

# Perform simulation
# total number of subject: 1000
sim1 <- rxSolve(mod9,theta,ev1,omega=omega,sigma=sigma,nSub=1000)

# Concentration
pk_vgcv <- sim1 %>%
  group_by(time) %>%
  # 10-90% Prediction interval
  summarise(medconc = median(cp),
            lowconc = quantile(cp,0.1),
            highconc = quantile(cp, 0.9)) %>%
  ungroup() %>%
  # time after last dose
  mutate(tald = time-156)

dat20 <- pk_vgcv %>%
  mutate(study="Vezina2014",
         drug="VGCV",
         pop="child")

# Adults -----
# Define typical patient: adults
BW <- 70 # kg
HT <- 170 # cm
AGE <- 40 # years old
SCR <- 95/88.4 # mg/dL (1mg/dL = 88.4umol/L)
CLcr <- ((140-AGE)*BW)/(72*SCR) # ~90mL/min, calculated by C-G
formula for adults

# Define fixed effect parameters
theta <- c(TVCL=14.5*((CLcr/60)*(70/BW))^0.492*(BW/70)^0.75,
          TVV2=87.5*(BW/70),
          TVQ =4.8*(BW/70)^0.75 ,
          TVV3=42.6*(BW/70),
          TVKA=3,

```

```

      TLAG=0.5)

# Define between subject variability
omega <- lotri(eta.CL ~ 0.335^2)

# Define unexplained variability
sigma <- lotri(prop.err.sd ~ 0.327^2)

dose_vgcv <- 900 # 900 mg/12h for adults

# Define event record
ev2 <- et(amount.units = "mg", time.units = "hours") %>%
  add.dosing(dosing.to = "depot",
            dose = dose_vgcv, # mg
            nbr.doses = 14,
            dosing.interval = 12,
            start.time = 0) %>%
  # 0-12h after the last dose
  add.sampling(seq(from=156,to=168.5,by=1))

# Perform simulation
# total number of subject: 1000
sim2 <- rxSolve(mod9,theta,ev2,omega=omega,sigma=sigma,nSub=1000)

# Concentration
pk_vgcv <- sim2 %>%
  group_by(time) %>%
  # 10-90% Prediction interval
  summarise(medconc = median(cp),
            lowconc = quantile(cp,0.1),
            highconc = quantile(cp, 0.9)) %>%
  ungroup() %>%
  # time after last dose
  mutate(tald = time-156)

dat21 <- pk_vgcv %>%
  mutate(study="Vezina2014",
        drug="VGCV",
        pop="adult")

# Infants -----
# Define typical patient: infants

```

```

BW <- 10 # kg
HT <- 70 # cm
AGE <- 1 # years old
SCR <- 50/88.4 # mg/dL (1mg/dL = 88.4umol/L)
k <- 0.45 # k = 0.45 for subjects aged less than 2 years
CLcr <- k*HT/SCR # ~ 55.7 mL/min/1.73 m2, calculated by modified
Schwartz formula for children

# Define fixed effect parameters
theta <- c(TVCL=14.5*((CLcr/60)*(70/BW))^0.492*(BW/70)^0.75,
          TVV2=87.5*(BW/70),
          TVQ =4.8*(BW/70)^0.75 ,
          TVV3=42.6*(BW/70),
          TVKA=3,
          TLAG=0.5)

# Define between subject variability
omega <- lotri(eta.CL ~ 0.335^2)

# Define unexplained variability
sigma <- lotri(prop.err.sd ~ 0.327^2)

dose_vgcv <- 10*BW # 10 mg/kg/12h for children

# Define event record
ev3 <- et(amount.units = "mg", time.units = "hours") %>%
  add.dosing(dosing.to = "depot",
            dose = dose_vgcv, # mg
            nbr.doses = 14,
            dosing.interval = 12,
            start.time = 0) %>%
  # 0-12h after the last dose
  add.sampling(seq(from=156,to=168.5,by=1))

# Perform simulation
# total number of subject: 1000
sim3 <- rxSolve(mod9,theta,ev3,omega=omega,sigma=sigma,nSub=1000)

# Concentration
pk_vgcv <- sim3 %>%
  group_by(time) %>%
  # 10-90% Prediction interval
  summarise(medconc = median(cp),
            lowconc = quantile(cp,0.1),

```

```

        highconc = quantile(cp, 0.9)) %>%
ungroup() %>%
# time after last dose
mutate(tald = time-156)

dat22 <- pk_vgcv %>%
  mutate(study="Vezina2014",
         drug="VGCV",
         pop="infant")

```

### Vezina et al.(2010)

```

# 10.##Vezina et al.(2010)## -----
-----
# Define model -----
-----
# CL/F = 7.33 (L/h)
# V/F = 35.1 (L)
# Ka = 0.85 (h-1)

# BSV (CV%): CL/F = 36.3%, V/F = 41.4%, Ka = 74.3%
# RUV: prop.err = 33.5%

# Typical patient: children (boys),10 years
old,BW=30kg,HT=130cm,SCR=70umol/L
# Dose: VGCV oral, 10 mg/kg/12h

set.seed(1234)
rxSetSeed(1234)

mod10 <- rxode2({
  CL = TVCL*exp(eta.CL);
  V = TVV*exp(eta.V);
  KA = TVKA*exp(eta.KA);

  C = centr/V;
  d/dt(depot) = -KA*depot;
  d/dt(centr) = KA*depot - CL*C;

  cp = C*(1 + prop.err.sd);
})

```

```

# Children -----
-----
# Define typical patient: children
BW <- 30 # kg
AGE <- 10 # years old

# Define fixed effect parameters
theta <- c(TVCL=7.33,
           TVV =35.1,
           TVKA=0.85)

# Define between subject variability
omega <- lotri(eta.CL ~ 0.363^2, eta.V ~ 0.414^2, eta.KA ~ 0.743^2)

# Define unexplained variability
sigma <- lotri(prop.err.sd ~ 0.335^2)

# DOSE of VGCV(oral) input -----
---
dose_vgcv <- 10*BW # 10 mg/kg/12h for Children

# Define event record
ev1 <- et(amount.units = "mg", time.units = "hours") %>%
  add.dosing(dosing.to = "depot",
            dose = dose_vgcv, # mg
            nbr.doses = 14,
            dosing.interval = 12,
            start.time = 0) %>%
  # 0-12h after the last dose
  add.sampling(seq(from=156,to=168,by=1))

# Perform simulation
# total number of subject: 1000
sim1 <- rxSolve(mod10,theta,ev1,omega=omega,sigma=sigma,nSub=1000)

# Concentration
pk_vgcv <- sim1 %>%
  group_by(time) %>%
  # 10-90% Prediction interval
  summarise(medconc = median(cp),
            lowconc = quantile(cp,0.1),

```

```

        highconc = quantile(cp, 0.9)) %>%
ungroup() %>%
# time after last dose
mutate(tald = time-156)

# make the margin smooth by lowess: can't make it
l0.1 <- lowess(pk_vgcv$tald, pk_vgcv$lowconc, f=0.2)
l0.5 <- lowess(pk_vgcv$tald, pk_vgcv$medconc, f=0.2)
l0.9 <- lowess(pk_vgcv$tald, pk_vgcv$highconc, f=0.2)

df0.1 <- data.frame(tald=l0.1$x, lowconc=l0.1$y)
df0.5 <- data.frame(tald=l0.5$x, medconc=l0.5$y)
df0.9 <- data.frame(tald=l0.9$x, highconc=l0.9$y)

vgcv_dat <- df0.1 %>%
  left_join(df0.5, by="tald") %>%
  left_join(df0.9, by="tald")

dat23 <- vgcv_dat %>%
  mutate(study="Vezina2010",
         drug="VGCV",
         pop="child")

```

### Caldés et al.(2009)

```

# 11.##Caldés et al.(2009)## -----
-----
# Define model -----
-----
# CL   = 7.49 × (CLcr/57) (L/h)
# V2   = 31.9 (L)
# Q    = 10.2 (L/h)
# V3   = 32 (L)
# Ka   = 0.895 (h-1)
# F1   = 0.825 ; TVF1=exp(1.5506)/(1+exp(1.5506))=0.825,
logitF=1.5506
# Tlag = 0.382 (h)
# BSV (CV%): CL = 32.7%, V2 = 47.6%, Ka = 68.1%, F1 = 22.1%
# prop.err = 14.3%, add.err = 0.465 ug/mL = 0.465 mg/L
# CLcr: creatinine clearance (mL/min), calculated by C-G formula

# Typical patient: adult (male), 40 years
old, BW=70kg, HT=170cm, SCR=95umol/L

```

```

# Dose:GCV iv: 5 mg/kg/12h, infusion=1h
# VGCV oral, 900 mg/12h (according to the drug label for treatment)

set.seed(123456)
rxSetSeed(123456)

mod11 <- rxode2({
  CL   = TVCL*exp(eta.CL);
  V2   = TVV2*exp(eta.V2);
  Q    = TVQ;
  V3   = TVV3;
  KA   = TVKA*exp(eta.KA);
  F1   = exp(logitF + eta.F1)/(1 + exp(logitF + eta.F1));

  C2 = centr/V2;
  C3 = peri/V3;
  d/dt(depot) = -KA*depot;
  d/dt(centr) = F1*KA*depot - CL*C2 - Q*C2 + Q*C3;
  d/dt(peri)  = Q*C2 - Q*C3;
  alag(depot) = TLAG;

  cp = C2*(1 + prop.err.sd) + add.err.sd;
})

# Adults -----
-----
# Define typical patient: adults
BW <- 70 # kg
HT <- 170 # cm
AGE <- 40 # years old
SCR <- 95/88.4 # mg/dL (1mg/dL = 88.4umol/L)
CLcr <- (140-AGE)*BW/(72*SCR) # mL/min, C-G formula

# Define fixed effect parameters
theta <- c(TVCL   = 7.49*(CLcr/57),
          TVV2   = 31.9,
          TVQ    = 10.2,
          TVV3   = 32,
          TVKA   = 0.895,
          logitF = 1.5506,
          TLAG   = 0.382)

# Define between subject variability

```

```

omega <- lotri(eta.CL ~ 0.327^2, eta.V2 ~ 0.476^2,
              eta.KA ~ 0.681^2, eta.F1 ~ 0.221^2)

# Define unexplained variability
sigma <- lotri(prop.err.sd ~ 0.143^2, add.err.sd ~ 0.465^2)

# DOSE of GCV(iv) input -----
---

dose_gcv <- 5*BW # 5 mg/kg/12h for adults

# Define event record
ev1 <- et(amount.units = "mg", time.units = "hours") %>%
  add.dosing(dosing.to = "centr",
            dose = dose_gcv, # mg
            rate = dose_gcv/1, # infusion for 1h
            nbr.doses = 14,
            dosing.interval = 12,
            start.time = 0) %>%
  # 0-12h after the last dose
  add.sampling(seq(from=156,to=168,by=1))

# Perform simulation
# total number of subject: 1000
sim1 <- rxSolve(mod11,theta,ev1,omega=omega,sigma=sigma,nSub=1000)

# Concentration
pk_gcv <- sim1 %>%
  group_by(time) %>%
  # 10-90% Prediction interval
  summarise(medconc = median(cp),
            lowconc = quantile(cp,0.1),
            highconc = quantile(cp, 0.9)) %>%
  ungroup() %>%
  # time after last dose
  mutate(tald = time-156)

dat24 <- pk_gcv %>%
  mutate(study="Caldés2009",
        drug="GCV",
        pop="adult")

# DOSE of VGCV(oral) input -----
---
```



```

dose_vgcv <- 900*0.72 # 900 mg/12h × 0.72 (the ratio between the
molecular weights of GCV and VGCV)

# Define event record
ev2 <- et(amount.units = "mg", time.units = "hours") %>%
  add.dosing(dosing.to = "depot",
            dose = dose_vgcv, # mg
            nbr.doses = 14,
            dosing.interval = 12,
            start.time = 0) %>%
  # 0-12h after the last dose
  add.sampling(seq(from=156,to=168,by=1))

# Perform simulation
# total number of subject: 1000
sim2 <- rxSolve(mod11,theta,ev2,omega=omega,sigma=sigma,nSub=1000)

# Concentration
pk_vgcv <- sim2 %>%
  group_by(time) %>%
  # 10-90% Prediction interval
  summarise(medconc = median(cp),
            lowconc = quantile(cp,0.1),
            highconc = quantile(cp, 0.9)) %>%
  ungroup() %>%
  # time after last dose
  mutate(tald = time-156)

dat25 <- pk_vgcv %>%
  mutate(study="Caldés2009",
        drug="VGCV",
        pop="adult")

```

### Perrottet et al.(2009)

```

# 12. ##Perrottet et al.(2009)## -----
-----
# Define model -----
-----
# CL =  $\theta_{\text{GraftType}} \times \text{GFR\_MDRD} \times 1.21^{\text{sex}}$  (L/h)
# V2 =  $24 \times (\text{BW}/70) \times 0.78^{\text{sex}}$  (L)
# Q = 4.1 (L/h)
# V3 = 22 (L)

```

```

# Ka = 0.56 (h-1)
# F = 0.6

# BSV (CV%): CL = 26%, V2 = 20%
# IOV (%): IOV.CL = 12%
# RUV: prop.err = 21%
#  $\theta$ GraftType:  $\theta$ kidney=1.68,  $\theta$ heart=0.86,  $\theta$ lung/liver=1.17
# GFR_MDRD: : four-variable modification of diet in renal disease
eGFR (L/h)
# sex: for male, sex=0 and for female, sex=1

# Typical patient: adult (male), 40 years
old, BW=70kg, HT=170cm, SCR=95umol/L
# Dose: GCV iv, 5 mg/kg/12h, infusion=1h
# VGCV oral, 900 mg/12h (according to the drug label for treatment)

set.seed(123456)
rxSetSeed(123456)

mod12 <- rxode2({
  CL = TVCL*exp(eta.CL + iov.CL);
  V2 = TVV2*exp(eta.V2);
  Q = TVQ;
  V3 = TVV3;
  KA = TVKA;
  F1 = TVF1;

  C2 = centr/V2;
  C3 = peri/V3;
  d/dt(depot) = -KA*depot;
  d/dt(centr) = F1*KA*depot - CL*C2 - Q*C2 + Q*C3;
  d/dt(peri) = Q*C2 - Q*C3;

  cp = C2*(1 + prop.err.sd);
})

# Adults -----
-----
# Define typical patient: adults
BW <- 70 # kg
HT <- 170 # cm
BSA <- sqrt(BW*HT/3600) # m2
AGE <- 40 # years old

```

```

SCR <- 95/88.4 # mg/dL (1mg/dL = 88.4umol/L)
sex <- 0 # 0 for male and 1 for female
# GFR_MDRD=175*(SCR^-1.154)*(AGE^-0.203) *0.742 (if female)
GFR_MDRD <- 175*(SCR^-1.154)*(AGE^-0.203) # ~ 76 mL/min/1.73m2
GFR_MDRD <- (GFR_MDRD/(1000/60))*(BSA/1.73) # ~ 4.8 L/h

# values of θGraftType
θkidney <- 1.68
θheart <- 0.86
θlung_liver <- 1.17

# 12.1 Kidney transplant -----
-----
# Define fixed effect parameters
theta <- c(TVCL=θkidney*GFR_MDRD*(1.21^sex) ,
          TVV2=24*(BW/70)*(0.78^sex) ,
          TVQ =4.1,
          TVV3=22,
          TVKA=0.56,
          TVF1=0.6)

# Define between subject variability
omega <- lotri(eta.CL ~ 0.26^2, eta.V2 ~ 0.2^2,
              iov.CL ~ 0.12^2)

# Define unexplained variability
sigma <- lotri(prop.err.sd ~ 0.21^2)

# DOSE of GCV(iv) input -----
---
dose_gcv <- 5*BW # 5 mg/kg/12h for adults

# Define event record
ev1 <- et(amount.units = "mg", time.units = "hours") %>%
  add.dosing(dosing.to = "centr",
            dose = dose_gcv, # mg
            rate = dose_gcv/1, # infusion for 1h
            nbr.doses = 14,
            dosing.interval = 12,
            start.time = 0) %>%
  # 0-12h after the last dose
  add.sampling(seq(from=156,to=168,by=1))

```

```

# Perform simulation
# total number of subject: 1000
sim1 <- rxSolve(mod12,theta,ev1,omega=omega,sigma=sigma,nSub=1000)

# Concentration
pk_gcv <- sim1 %>%
  group_by(time) %>%
  # 10-90% Prediction interval
  summarise(medconc = median(cp),
            lowconc = quantile(cp,0.1),
            highconc = quantile(cp, 0.9)) %>%
  ungroup() %>%
  # time after last dose
  mutate(tald = time-156)

dat26 <- pk_gcv %>%
  mutate(study="Perrottet2009_kidney",
         drug="GCV",
         pop="adult")

# plot adults VGCV(oral) conc vs time -----
-----
dose_vgcv <- 900 # 900 mg/12h for adults

# Define event record
ev2 <- et(amount.units = "mg", time.units = "hours") %>%
  add.dosing(dosing.to = "depot",
            dose = dose_vgcv, # mg
            nbr.doses = 14,
            dosing.interval = 12,
            start.time = 0) %>%
  # 0-12h after the last dose
  add.sampling(seq(from=156,to=168,by=1))

# Perform simulation
# total number of subject: 1000
sim2 <- rxSolve(mod12,theta,ev2,omega=omega,sigma=sigma,nSub=1000)

# Concentration
pk_vgcv <- sim2 %>%
  group_by(time) %>%
  # 10-90% Prediction interval

```

```

summarise(medconc = median(cp),
          lowconc = quantile(cp,0.1),
          highconc = quantile(cp, 0.9)) %>%
ungroup() %>%
# time after last dose
mutate(tald = time-156)

dat27 <- pk_vgcv %>%
  mutate(study="Perrottet2009_kidney",
         drug="VGCV",
         pop="adult")

# 12.2 heart transplant -----
-----
# Define fixed effect parameters
theta <- c(TVCL=theta*GFR_MDRD*(1.21^sex) ,
          TVV2=24*(BW/70)*(0.78^sex) ,
          TVQ =4.1,
          TVV3=22,
          TVKA=0.56,
          TVF1 =0.6)

# Define between subject variability
omega <- lotri(eta.CL ~ 0.26^2, eta.V2 ~ 0.2^2,
              iov.CL ~ 0.12^2)

# Define unexplained variability
sigma <- lotri(prop.err.sd ~ 0.21^2)

# DOSE of GCV(iv) input -----
---
dose_gcv <- 5*BW # 5 mg/kg/12h for adults

# Define event record
ev3 <- et(amount.units = "mg", time.units = "hours") %>%
  add.dosing(dosing.to = "centr",
            dose = dose_gcv, # mg
            rate = dose_gcv/1, # infusion for 1h
            nbr.doses = 14,
            dosing.interval = 12,
            start.time = 0) %>%
# 0-12h after the last dose
add.sampling(seq(from=156,to=168,by=1))

```

```

# Perform simulation
# total number of subject: 1000
sim3 <- rxSolve(mod12,theta,ev3,omega=omega,sigma=sigma,nSub=1000)

# Concentration
pk_gcv <- sim3 %>%
  group_by(time) %>%
  # 10-90% Prediction interval
  summarise(medconc = median(cp),
            lowconc = quantile(cp,0.1),
            highconc = quantile(cp, 0.9)) %>%
  ungroup() %>%
  # time after last dose
  mutate(tald = time-156)

dat28 <- pk_gcv %>%
  mutate(study="Perrottet2009_heart",
         drug="GCV",
         pop="adult")

# plot adults VGCV(oral) conc vs time -----
-----
dose_vgcv <- 900 # 900 mg/12h for adults

# Define event record
ev4 <- et(amount.units = "mg", time.units = "hours") %>%
  add.dosing(dosing.to = "depot",
            dose = dose_vgcv, # mg
            nbr.doses = 14,
            dosing.interval = 12,
            start.time = 0) %>%
  # 0-12h after the last dose
  add.sampling(seq(from=156,to=168,by=1))

# Perform simulation
# total number of subject: 1000
sim4 <- rxSolve(mod12,theta,ev4,omega=omega,sigma=sigma,nSub=1000)

# Concentration
pk_vgcv <- sim4 %>%
  group_by(time) %>%
  # 10-90% Prediction interval

```

```

summarise(medconc = median(cp),
          lowconc = quantile(cp, 0.1),
          highconc = quantile(cp, 0.9)) %>%
ungroup() %>%
# time after last dose
mutate(tald = time-156)

dat29 <- pk_vgcv %>%
  mutate(study="Perrottet2009_heart",
         drug="VGCV",
         pop="adult")

# 12.3 lung_liver transplant -----
-----
# Define fixed effect parameters
theta <- c(TVCL=θlung_liver*GFR_MDRD*(1.21^sex) ,
          TVV2=24*(BW/70)*(0.78^sex),
          TVQ =4.1,
          TVV3=22,
          TVKA=0.56,
          TVF1 =0.6)

# Define between subject variability
omega <- lotri(eta.CL ~ 0.26^2, eta.V2 ~ 0.2^2,
              iov.CL ~ 0.12^2)

# Define unexplained variability
sigma <- lotri(prop.err.sd ~ 0.21^2)

# DOSE of GCV(iv) input -----
----
dose_gcv <- 5*BW # 5 mg/kg/12h for adults

# Define event record
ev5 <- et(amount.units = "mg", time.units = "hours") %>%
  add.dosing(dosing.to = "centr",
            dose = dose_gcv, # mg
            rate = dose_gcv/1, # infusion for 1h
            nbr.doses = 14,
            dosing.interval = 12,
            start.time = 0) %>%
# 0-12h after the last dose

```

```

add.sampling(seq(from=156,to=168,by=1))

# Perform simulation
# total number of subject: 1000
sim5 <- rxSolve(mod12,theta,ev5,omega=omega,sigma=sigma,nSub=1000)

# Concentration
pk_gcv <- sim5 %>%
  group_by(time) %>%
  # 10-90% Prediction interval
  summarise(medconc = median(cp),
            lowconc = quantile(cp,0.1),
            highconc = quantile(cp, 0.9)) %>%
  ungroup() %>%
  # time after last dose
  mutate(tald = time-156)

dat30 <- pk_gcv %>%
  mutate(study="Perrottet2009_lung_liver",
         drug="GCV",
         pop="adult")

# plot adults VGCV(oral) conc vs time -----
-----
dose_vgcv <- 900 # 900 mg/12h for adults

# Define event record
ev6 <- et(amount.units = "mg", time.units = "hours") %>%
  add.dosing(dosing.to = "depot",
            dose = dose_vgcv, # mg
            nbr.doses = 14,
            dosing.interval = 12,
            start.time = 0) %>%
  # 0-12h after the last dose
  add.sampling(seq(from=156,to=168.86,by=1))

# Perform simulation
# total number of subject: 1000
sim6 <- rxSolve(mod12,theta,ev6,omega=omega,sigma=sigma,nSub=1000)

# Concentration
pk_vgcv <- sim6 %>%
  group_by(time) %>%

```



```

# 10-90% Prediction interval
summarise(medconc = median(cp),
          lowconc = quantile(cp, 0.1),
          highconc = quantile(cp, 0.9)) %>%
ungroup() %>%
# time after last dose
mutate(tald = time-156)

dat31 <- pk_vgcv %>%
  mutate(study="Perrottet2009_lung_liver",
         drug="VGCV",
         pop="adult")

```

### Zhao et al.(2009)

```

# 13.##zhao et al.(2009)## -----
-----
# Define model -----
-----
# CL = 8.04 x (CLcr/89)^2.93 + 3.62 x (BW/28) (L/h)
# V2 = 5.2 (L)
# Q = 3.97 (L/h)
# V3 = 30.7 (L)
# Ka = 0.369 (h-1)
# Tlag = 0.743 (h)

# BSV (CV%): CL = 23.83%, V2 = 58.22%, Ka = 32.25%
# RUV: exponential.err = 20.93%
# CLcr: creatinine clearance (mL/min), calculated by Schwartz formula

# Typical patient: children(boys),10 years old,BW=30kg,SCR=70umol/L
# VGCV oral, 10 mg/kg/12h

set.seed(1234)
rxSetSeed(1234)

mod13 <- rxode2({
  CL = TVCL*exp(eta.CL);
  V2 = TVV2*exp(eta.V2);
  Q = TVQ;
  V3 = TVV3;
  KA = TVKA*exp(eta.KA);

```

```

C2 = centr/V2;
C3 = peri/V3;
d/dt(depot) = -KA*depot;
d/dt(centr) = KA*depot - CL*C2 - Q*C2 + Q*C3;
d/dt(peri) = Q*C2 - Q*C3;
alag(depota) = TLAG;

cp = C2*exp(expo.err.sd);
})

# Children -----
-----
# Define typical patient: children
BW <- 30 # kg
HT <- 130 # cm
BSA <- sqrt(BW*HT/3600) # m2
SCR <- 70/88.4 # mg/dL (1mg/dL = 88.4umol/L)
k <- 0.55 # k = 0.55 for boys aged 2 years to less than 13 years
CLcr <- k*HT/SCR # ~ 90 mL/min/1.73 m2, calculated by Schwartz
formula
CLcr <- CLcr*(BSA/1.73) # ~ 54 mL/min

# Define fixed effect parameters
theta <- c(TVCL=8.04*((CLcr/89)^2.93) + 3.62*(BW/28),
          TVV2=5.2,
          TVQ =3.97,
          TVV3=30.7,
          TVKA=0.369,
          TLAG=0.743)

# Define between subject variability
omega <- lotri(eta.CL ~ 0.2383^2,
              eta.V2 ~ 0.5822^2,
              eta.KA ~ 0.3225^2)

# Define unexplained variability
sigma <- lotri(expo.err.sd ~ 0.2093^2)

# DOSE of VGCV(oral) input -----
---
dose_vgcv <- 10*BW # 10 mg/kg/12h for children

# Define event record
ev1 <- et(amount.units = "mg", time.units = "hours") %>%

```

```

add.dosing(dosing.to = "depot",
           dose = dose_vgcv, # mg
           nbr.doses = 14,
           dosing.interval = 12,
           start.time = 0) %>%
# 0-12h after the last dose
add.sampling(seq(from=156,to=168.93,by=1))

# Perform simulation
# total number of subject: 1000
sim1 <- rxSolve(mod13,theta,ev1,omega=omega,sigma=sigma,nSub=1000)

# Concentration
pk_vgcv <- sim1 %>%
  group_by(time) %>%
  # 10-90% Prediction interval
  summarise(medconc = median(cp),
            lowconc = quantile(cp,0.1),
            highconc = quantile(cp, 0.9)) %>%
  ungroup() %>%
  # time after last dose
  mutate(tald = time-156)

dat32 <- pk_vgcv %>%
  mutate(study="Zhao2009",
         drug="VGCV",
         pop="child")

```

### Acosta et al.(2007)

```

# 14.##Acosta et al.(2007)## -----
-----
# Define model -----
-----
# Ka = 0.591 (h-1)
# CL = 0.146 x BW^1.68 (L/h)
# V = 1.15 x BW (L)
# F1 = 0.536
# BSV (CV%): CL = 28.4%, F1 = 12.4%
# expo.err = 45.4%
# BW (kg)

```

```

# Typical patient:
neonates(boys),PMA=40weeks,HT=50cm,BW=3kg,SCR=30umol/L
# Dose: GCV iv, 5 mg/kg/12h, inf=1h; VGCV oral, 10 mg/kg/12h

set.seed(123456)
rxSetSeed(123456)

mod14 <- rxode2({
  CL  = TVCL*exp(eta.CL);
  V   = TVV;
  KA  = TVKA;
  F1  = TVF1*exp(eta.F1);

  C = centr/V;
  d/dt(depot) = -KA*depot;
  d/dt(centr) = F1*KA*depot - CL*C;

  cp = C*exp(expo.err.sd);
})

# Neonates -----
-----
# Define typical patient: neonates
BW <- 3 # kg

# Define fixed effect parameters
theta <- c(TVCL=0.146*(BW^1.68),
           TVV=1.15*BW,
           TVKA=0.591,
           TVF1=0.563)

# Define between subject variability
omega <- lotri(eta.CL ~ 0.284^2, eta.F1 ~ 0.124^2)

# Define unexplained variability
sigma <- lotri(expo.err.sd ~ 0.454^2)

# DOSE of GCV(iv) input -----
---
dose_gcv <- 5*BW # 5 mg/kg/12h for neonates

# Define event record

```

```

ev1 <- et(amount.units = "mg", time.units = "hours") %>%
  add.dosing(dosing.to = "centr",
            dose = dose_gcv, # mg
            rate = dose_gcv/1, # infusion for 1h
            nbr.doses = 14,
            dosing.interval = 12,
            start.time = 0) %>%
  # 0-12h after the last dose
  add.sampling(seq(from=156,to=168,by=1))

# Perform simulation
# total number of subject: 1000
sim1 <- rxSolve(mod14,theta,ev1,omega=omega,sigma=sigma,nSub=1000)

# Concentration
pk_gcv <- sim1 %>%
  group_by(time) %>%
  # 10-90% Prediction interval
  summarise(medconc = median(cp),
            lowconc = quantile(cp,0.1),
            highconc = quantile(cp, 0.9)) %>%
  ungroup() %>%
  # time after last dose
  mutate(tald = time-156)

dat33 <- pk_gcv %>%
  mutate(study="Acosta2007",
         drug="GCV",
         pop="neonate")

# DOSE of VGCV(oral) input -----
---
dose_vgcv <- 10*BW # 10 mg/kg/12h for neonates

# Define event record
ev2 <- et(amount.units = "mg", time.units = "hours") %>%
  add.dosing(dosing.to = "depot",
            dose = dose_vgcv, # mg
            nbr.doses = 14,
            dosing.interval = 12,
            start.time = 0) %>%
  # 0-12h after the last dose
  add.sampling(seq(from=156,to=168,by=1))

```

```

# Perform simulation
# total number of subject: 1000
sim2 <- rxSolve(mod14,theta,ev2,omega=omega,sigma=sigma,nSub=1000)

# Concentration
pk_vgcv <- sim2 %>%
  group_by(time) %>%
  # 10-90% Prediction interval
  summarise(medconc = median(cp),
            lowconc = quantile(cp,0.1),
            highconc = quantile(cp, 0.9)) %>%
  ungroup() %>%
  # time after last dose
  mutate(tald = time-156)

dat34 <- pk_vgcv %>%
  mutate(study="Acosta2007",
         drug="VGCV",
         pop="neonate")

```

### Zhou et al.(1996)

```

# 15.##Zhou et al.(1996)## -----
# Define model -----
-----
# CL = 0.262 + (0.00271 x ASCC) (L/h)
# V = 0.627 + (0.437 x BW) (L)

# see in Table 2
# omega^2: CL = 0.125, V = 0.0904
# COV: covariance between CL and V 0.0813
# prop.err^2 = 0.00715

# Typical patient:
neonates(boys),PMA=40weeks,HT=50cm,BW=3kg,SCR=30umol/L
# ASCC, approximated creatininie clearance from serum (mL/min/1.73
m2), Schwartz formula
# Dose: GCV iv, 5 mg/kg/12h, infusion=1h

set.seed(12345)
rxSetSeed(12345)

```

```

mod15 <- rxode2({
  CL = TVCL*exp(eta.CL);
  V  = TVV*exp(eta.V);

  C = centr/V;
  d/dt(centr) = - CL*C;

  cp = C*(1 + prop.err.sd);
})

# Neonates -----
# Define typical patient: neonates
BW <- 3 # kg
HT <- 50 # cm
SCR <- 30/88.4 # mg/dL (1mg/dL = 88.4umol/L)
k <- 0.55 # k = 0.55 in the discussion
ASCC <- k*HT/SCR # ~ 81 mL/min/1.73 m2, calculated by Schwartz
formula

# Define fixed effect parameters
theta <- c(TVCL=0.262 + (0.00271*ASCC),
           TVV=0.627 + (0.437*BW))

# Define between subject variability
omega <- lotri(eta.CL + eta.V ~
              c(0.125,
                0.0813,0.0904))

# Define unexplained variability
sigma <- lotri(prop.err.sd ~ 0.00715)

# DOSE of GCV(iv) input -----
# Define event record
ev1 <- et(amount.units = "mg", time.units = "hours") %>%
  add.dosing(dosing.to = "centr",
            dose = dose_gcv, # mg
            rate = dose_gcv/1, # infusion for 1h
            nbr.doses = 14,

```

```

        dosing.interval = 12,
        start.time = 0) %>%
# 0-12h after the last dose
add.sampling(seq(from=156,to=168,by=1))

# Perform simulation
# total number of subject: 1000
sim1 <- rxSolve(mod15,theta,ev1,omega=omega,sigma=sigma,nSub=1000)

# Concentration
pk_gcv <- sim1 %>%
  group_by(time) %>%
  # 10-90% Prediction interval
  summarise(medconc = median(cp),
            lowconc = quantile(cp,0.1),
            highconc = quantile(cp, 0.9)) %>%
  ungroup() %>%
  # time after last dose
  mutate(tald = time-156)

dat35 <- pk_gcv %>%
  mutate(study="Zhou1996",
         drug="GCV",
         pop="neonate")

```

### Yuen et al.(1995)

```

# 16.##Yuen et al.(1995)## -----
-----
# Define model -----
-----
# CL = 0.382 + 0.168 x BW x CLcr/100 x (1-Trans) x (1-CMV) (L/h)
# V1 = 0.381 x BW (L)
# Q = 13.4 (L/h)
# V2 = 0.511 x BW (L)

# BSV (CV%): CL = 47.5%, V1 = 27.5%
# prop.err = 36.1%

# CLcr: creatinine clearance (mL/min), calculated by C-G formula
# T: 0 for nontransplant patients and 0.76 for transplant patients
# CMV: 0 for CMV-shedding patients and 0.41 for patients with CMV
retinitis

```



```

# Typical patient: adult(male),40 years old,BW=70kg,SCR=95umol/L
# Dose: GCV iv, 5 mg/kg/12h

set.seed(12345)
rxSetSeed(12345)

mod16 <- rxode2({
  CL = TVCL*exp(eta.CL);
  V1 = TVV1*exp(eta.V1);
  Q = TVQ;
  V2 = TVV2;

  C1 = centr/V1;
  C2 = peri/V2
  d/dt(centr) = - CL*C1 - Q*C1 + Q*C2;
  d/dt(peri) = Q*C1 - Q*C2;

  cp = C1*(1 + prop.err.sd);
})

# Adults -----
-----
# Define typical patient: adults
BW <- 70 # kg
AGE <- 40 # years old
SCR <- 95/88.4 # mg/dL (1mg/dL = 88.4umol/L)
CLcr <- (140-AGE)*BW/(72*SCR) # ~ 90 mL/min
Trans <- 0 # 0 for nontransplant patients and 0.76 for transplant
patients
CMV <- 0 # 0 for CMV-shedding patients and 0.41 for patients with CMV
retinitis

# Define fixed effect parameters
theta <- c(TVCL=0.382 + 0.168*BW *CLcr/100*(1-Trans)*(1-CMV),
          TVV1=0.381*BW,
          TVQ=13.4,
          TVV2=0.511*BW)

# Define between subject variability
omega <- lotri(eta.CL ~ 0.475^2, eta.V1 ~ 0.275^2)

# Define unexplained variability

```

```

sigma <- lotri(prop.err.sd ~ 0.361^2)

# DOSE of GCV(iv) input -----
---
dose_gcv <- 5*BW # 5 mg/kg/12h for adults

# Define event record
ev1 <- et(amount.units = "mg", time.units = "hours") %>%
  add.dosing(dosing.to = "centr",
            dose = dose_gcv, # mg
            rate = dose_gcv/1, # infusion for 1h
            nbr.doses = 14,
            dosing.interval = 12,
            start.time = 0) %>%
  # 0-12h after the last dose
  add.sampling(seq(from=156,to=168,by=1))

# Perform simulation
# total number of subject: 1000
sim1 <- rxSolve(mod16,theta,ev1,omega=omega,sigma=sigma,nSub=1000)

# Concentration
pk_gcv <- sim1 %>%
  group_by(time) %>%
  # 10-90% Prediction interval
  summarise(medconc = median(cp),
            lowconc = quantile(cp,0.1),
            highconc = quantile(cp, 0.9)) %>%
  ungroup() %>%
  # time after last dose
  mutate(tald = time-156)

dat36 <- pk_gcv %>%
  mutate(study="Yuen1995",
        drug="GCV",
        pop="adult")

###Merge data###-----
# combine data
dat <-
rbind(dat1,dat2,dat3,dat5,dat6,dat7,dat8,dat9,dat10,dat11,dat12,

```

```

dat13,dat14,dat15,dat16,dat17,dat18,dat19,dat20,dat21,dat22,

dat24,dat25,dat26,dat27,dat28,dat29,dat30,dat31,dat32,dat33,
      dat34,dat35,dat36) %>%
  select(tald,lowconc,medconc,highconc,study,drug,pop) %>%
  rbind(dat4,dat23)

# filter different drug's data
dat_gcv <- dat %>%
  filter(drug=="GCV")

dat_vgcv <- dat %>%
  filter(drug=="VGCV")

# plot -----
# GCV-Children -----
-----
dat_gcv1 <- dat_gcv %>%
  filter(pop=="child")

# arrange by levels
dat_gcv1$study <- factor(dat_gcv1$study, levels =
c("Li2021","Franck2021","Nguyen2021"))

# change the label names
labelname1 <- c("Li2021"="Li et al. (2021)",
               "Franck2021"="Franck et al. (2021)",
               "Nguyen2021"="Nguyen et al. (2021)")

y_breaks <- c(0,10,20,30)

p11 <- dat_gcv1 %>%
  ggplot(mapping=aes(x=tald, y=medconc)) +
  geom_line(size=1.5, color="orange") +
  geom_ribbon(aes(x=tald,ymin=lowconc,ymax=highconc), fill =
"orange",alpha=0.2) +
  facet_wrap( ~ study, nrow = 1,
             labeller = labeller(study=as_labeller(labelname1))) +
  theme_bw(base_size = 30) +
  scale_x_continuous("Time (h)", limits = c(0,12.1), breaks =
c(0,2,4,6,8,10,12)) +
  scale_y_continuous("Concentration (mg/L)") +
  coord_cartesian(ylim = c(0,35)) +

```

```

ggtitle("C Children: 30 kg, 10 years old") +
theme (legend.position = "none",
      plot.background = element_blank(),
      panel.grid.minor = element_blank(),
      panel.grid.major = element_blank(),
      plot.title = element_text(hjust = 0,
                                size = 30))

jpeg(filename = paste0(output_dir, "/GCV_children.jpg"),
      width=8000, height=2500, res=300)
print(pl1)
dev.off()

# GCV-adults -----
-----
dat_gcv2 <- dat_gcv %>%
  filter(pop=="adult")

# arrange by levels
dat_gcv2$study <- factor(dat_gcv2$study, levels = c("Yuen1995",
                                                    "Perrottet2009_kidney",
                                                    "Perrottet2009_heart",

                                                    "Perrottet2009_lung_liver",

                                                    "Caldés2009",
                                                    "Horvatits2014",
                                                    "Krens2020",
                                                    "Lalagkas2023"))

# change the label names
labelname2 <- c("Lalagkas2023"="Lalagkas et al. (2023)",
                "Krens2020"="Krens et al. (2020)",
                "Horvatits2014"="Horvatits et al. (2014)",
                "Caldés2009"="Caldés et al. (2009)",
                "Perrottet2009_kidney"="Perrottet et al.
(2009)\nkidney",
                "Perrottet2009_heart"="Perrottet et al. (2009)\nheart",
                "Perrottet2009_lung_liver"="Perrottet et al.
(2009)\nlung/liver",
                "Yuen1995"="Yuen et al. (1995)")

pl2 <- dat_gcv2 %>%

```

```

ggplot(mapping=aes(x=tald, y=medconc)) +
  geom_line(size=1.5, color="orange") +
  geom_ribbon(aes(x=tald,ymin=lowconc,ymax=highconc), fill =
"orange",alpha=0.2) +
  facet_wrap( ~ study, nrow = 1,
              labeller = labeller(study=as_labeller(labelname2))) +
  theme_bw(base_size = 30) +
  scale_x_continuous("Time (h)", limits = c(0,12.1), breaks =
c(0,2,4,6,8,10,12)) +
  scale_y_continuous("Concentration (mg/L)") +
  coord_cartesian(ylim = c(0,35)) +
  ggtitle("D Adults: 70 kg, 40 years old") +
  theme (legend.position = "none",
        plot.background = element_blank(),
        panel.grid.minor = element_blank(),
        panel.grid.major = element_blank(),
        plot.title = element_text(hjust = 0,
                                   size = 30))

jpeg(filename = paste0(output_dir,"/GCV_adults.jpg"),
      width=8000, height=2500, res=300)
print(pl2)
dev.off()

# GCV-neonates -----
-----
dat_gcv3 <- dat_gcv %>%
  filter(pop=="neonate")

# arrange by levels
dat_gcv3$study <- factor(dat_gcv3$study, levels = c("Zhou1996",
                                                    "Acosta2007",
                                                    "Nguyen2021"))

# change the label names
labelname3 <- c("Zhou1996"="Zhou et al. (1996)",
                "Acosta2007"="Acosta et al. (2007)",
                "Nguyen2021"="Nguyen et al. (2021)")

pl3 <- dat_gcv3 %>%
  ggplot(mapping=aes(x=tald, y=medconc)) +

```

```

geom_line(size=1.5, color="orange") +
geom_ribbon(aes(x=tald,ymin=lowconc,ymax=highconc), fill =
"orange",alpha=0.2) +
facet_wrap( ~ study, nrow = 1,
            labeller = labeller(study=as_labeller(labelname3))) +
theme_bw(base_size = 30) +
scale_x_continuous("Time (h)", limits = c(0,12.1), breaks =
c(0,2,4,6,8,10,12)) +
scale_y_continuous("Concentration (mg/L)") +
coord_cartesian(ylim = c(0,35)) +
ggtitle("A Neonates: 3 kg, PMA 40 weeks") +
theme (legend.position = "none",
       plot.background = element_blank(),
       panel.grid.minor = element_blank(),
       panel.grid.major = element_blank(),
       plot.title = element_text(hjust = 0,
                                size = 30))

jpeg(filename = paste0(output_dir,"/GCV_neonates.jpg"),
      width=8000, height=2500, res=300)
print(pl3)
dev.off()

# GCV-infants -----
-----
dat_gcv4 <- dat_gcv %>%
  filter(pop=="infant")

# arrange by levels
dat_gcv4$study <- factor(dat_gcv4$study, levels = c("Li2021",
                                                    "Franck2021",
                                                    "Nguyen2021"))

# change the label names
labelname4 <- c("Li2021"="Li et al. (2021)",
                "Franck2021"="Franck et al. (2021)",
                "Nguyen2021"="Nguyen et al. (2021)")

pl4 <- dat_gcv4 %>%
  ggplot(mapping=aes(x=tald, y=medconc)) +
  geom_line(size=1.5, color="orange") +
  geom_ribbon(aes(x=tald,ymin=lowconc,ymax=highconc), fill =
"orange",alpha=0.2) +

```

```

facet_wrap( ~ study, nrow = 1,
            labeller = labeller(study=as_labeller(labelname4))) +
theme_bw(base_size = 30) +
scale_x_continuous("Time (h)", limits = c(0,12.1), breaks =
c(0,2,4,6,8,10,12)) +
scale_y_continuous("Concentration (mg/L)") +
coord_cartesian(ylim = c(0,35)) +
ggtitle("B Infants: 10 kg, 1 year old") +
theme (legend.position = "none",
        plot.background = element_blank(),
        panel.grid.minor = element_blank(),
        panel.grid.major = element_blank(),
        plot.title = element_text(hjust = 0,
                                   size = 30))

jpeg(filename = paste0(output_dir, "/GCV_infants.jpg"),
      width=8000, height=2500, res=300)
print(pl4)
dev.off()

# add a blank grid by plot_grid for GCV_neonates
f1 <- plot_grid(pl3 + theme(axis.title = element_blank()), # remove
axis titles
                NULL,
                align = "h",
                rel_widths = c(3.2,5)) # adjust the relative widths

# add a blank grid by plot_grid for GCV_infants
f2 <- plot_grid(pl4 + theme(axis.title = element_blank()), # remove
axis titles
                NULL,
                align = "h",
                rel_widths = c(3.2,5)) # adjust the relative widths

# add a blank grid by plot_grid for GCV_children
f3 <- plot_grid(pl1 + theme(axis.title = element_blank()), # remove
axis titles
                NULL,
                align = "h",
                rel_widths = c(3.2,5)) # adjust the relative widths

# combine GCV
pl <- plot_grid(f1,

```

```

f2,
f3,
pl2 + theme(axis.title = element_blank()), # remove
axis titles

nrow = 4,
axis = "1",
rel_widths = c(1,0.8,1))

pl_neo_inf <- plot_grid(pl3 + theme(axis.title = element_blank()),
  NULL,
  pl4 + theme(axis.title = element_blank()),
  nrow = 1,
  rel_widths = c(1.1,0.6,1.1))

pl_neo_inf

pl <- plot_grid(pl_neo_inf,
  f3,
  pl2 + theme(axis.title = element_blank()),
  nrow = 3,axis = "1",
  rel_widths = c(0.05,1,1))

# Add a common axis title
library(ggpubr) # annotate_figure()

p <- annotate_figure(pl, # the objective
  left=text_grob("Concentration (mg/L)", # on the
left
  face = "bold",
  size = 30,
  rot = 90), # the angle to rotate the
text
  bottom=text_grob("Time (h)",
  face = "bold",
  size = 30))

# output -----
jpeg(filename = paste0(output_dir,"/GCV1.jpg"),
  width=9000, height=6200, res=300)
print(p)
dev.off()

```



```

# VGCV-Children -----
-----

dat_vgcv1 <- dat_vgcv %>%
  filter(pop=="child")

# arrange by levels
dat_vgcv1$study <- factor(dat_vgcv1$study, levels=c("Zhao2009",
                                                    "Vezina2010",
                                                    "Vezina2014",
                                                    "Facchin2019",
                                                    "Franck2021",
                                                    "Nguyen2021"))

# change the label names
labelname1 <- c("Zhao2009"="Zhao et al. (2009)",
                "Vezina2010"="Vezina et al. (2010)",
                "Vezina2014"="Vezina et al. (2014)",
                "Facchin2019"="Facchin et al. (2019)",
                "Franck2021"="Franck et al. (2021)",
                "Nguyen2021"="Nguyen et al. (2021)")

y_breaks <- c(0,10,20,30)

p11 <- dat_vgcv1 %>%
  ggplot(mapping=aes(x=tald, y=medconc)) +
  geom_line(size=1.5, color="orange") +
  geom_ribbon(aes(x=tald,ymin=lowconc,ymax=highconc), fill =
"orange",alpha=0.2) +
  facet_wrap( ~ study, nrow = 1,
             labeller = labeller(study=as_labeller(labelname1))) +
  theme_bw(base_size = 30) +
  scale_x_continuous("Time (h)", limits = c(0,12.1), breaks =
c(0,2,4,6,8,10,12)) +
  scale_y_continuous("Concentration (mg/L)") +
  coord_cartesian(ylim = c(0,20)) +
  ggtitle("C Children: 30 kg, 10 years old") +
  theme (legend.position = "none",
        plot.background = element_blank(),
        panel.grid.minor = element_blank(),
        panel.grid.major = element_blank(),
        plot.title = element_text(hjust = 0,
                                   size = 30))

```

```

jpeg(filename = paste0(output_dir, "/VGCV_children.jpg"),
      width=8000, height=2500, res=300)
print(pl1)
dev.off()

# VGCV-adults -----
-----

dat_vgcv2 <- dat_vgcv %>%
  filter(pop=="adult")

# arrange by levels
dat_vgcv2$study <- factor(dat_vgcv2$study,
  levels=c("Perrottet2009_kidney",
            "Perrottet2009_heart",
            "Perrottet2009_lung_liver",
            "Caldés2009",
            "Vezina2014",
            "Facchin2019",
            "Chen2021",
            "Lalagkas2023"))

# change the label names
labelname2 <- c("Perrottet2009_kidney"="Perrottet et al.
(2009)\nkidney",
               "Perrottet2009_heart"="Perrottet et al. (2009)\nheart",
               "Perrottet2009_lung_liver"="Perrottet et al.
(2009)\nlung/liver",
               "Caldés2009"="Caldés et al. (2009)",
               "Vezina2014"="Vezina et al. (2014)",
               "Facchin2019"="Facchin et al. (2019)",
               "Chen2021"="Chen et al. (2021)",
               "Lalagkas2023"="Lalagkas et al. (2023)")

pl2 <- dat_vgcv2 %>%
  ggplot(mapping=aes(x=tald, y=medconc)) +
  geom_line(size=1.5, color="orange") +
  geom_ribbon(aes(x=tald, ymin=lowconc, ymax=highconc), fill =
"orange", alpha=0.2) +
  facet_wrap( ~ study, nrow = 1,
             labeller = labeller(study=as_labeller(labelname2))) +
  theme_bw(base_size = 30) +

```

```

    scale_x_continuous("Time (h)", limits = c(0,12.1), breaks =
c(0,2,4,6,8,10,12)) +
    scale_y_continuous("Concentration (mg/L)") +
    coord_cartesian(ylim = c(0,20)) +
    ggtitle("D Adults: 70 kg, 40 years old") +
    theme (legend.position = "none",
          plot.background = element_blank(),
          panel.grid.minor = element_blank(),
          panel.grid.major = element_blank(),
          plot.title = element_text(hjust = 0,
                                   size = 30))

jpeg(filename = paste0(output_dir, "/VGCV_adults.jpg"),
      width=8000, height=2500, res=300)
print(pl2)
dev.off()

# VGCV-neonates -----
-----
dat_vgcv3 <- dat_vgcv %>%
  filter(pop=="neonate")

# arrange by levels
dat_vgcv3$study <- factor(dat_vgcv3$study, levels=c("Acosta2007",
                                                    "Nguyen2021"))

# change the label names
labelname3 <- c("Acosta2007"="Acosta et al. (2007)",
               "Nguyen2021"="Nguyen et al. (2021)")

pl3 <- dat_vgcv3 %>%
  ggplot(mapping=aes(x=tald, y=medconc)) +
  geom_line(size=1.5, color="orange") +
  geom_ribbon(aes(x=tald,ymin=lowconc,ymax=highconc), fill =
"orange",alpha=0.2) +
  facet_wrap( ~ study, nrow = 1,
            labeller = labeller(study=as_labeller(labelname3))) +
  theme_bw(base_size = 30) +
  scale_x_continuous("Time (h)", limits = c(0,12.1), breaks =
c(0,2,4,6,8,10,12)) +
  scale_y_continuous("Concentration (mg/L)") +
  coord_cartesian(ylim = c(0,20)) +
  ggtitle("A Neonates: 3 kg, PMA 40 weeks") +

```

```

theme (legend.position = "none",
      plot.background = element_blank(),
      panel.grid.minor = element_blank(),
      panel.grid.major = element_blank(),
      plot.title = element_text(hjust = 0,
                                size = 30))

jpeg(filename = paste0(output_dir, "/VGCV_neonates.jpg"),
      width=8000, height=2500, res=300)
print(pl3)
dev.off()

# VGCV-infants -----
-----

dat_vgcv4 <- dat_vgcv %>%
  filter(pop=="infant")

# arrange by levels
dat_vgcv4$study <- factor(dat_vgcv4$study, levels=c("Vezina2014",
                                                    "Franck2021",
                                                    "Nguyen2021"))

# change the label names
labelname4 <- c("Vezina2014"="Vezina et al. (2014)",
                "Franck2021"="Franck et al. (2021)",
                "Nguyen2021"="Nguyen et al. (2021)")

pl4 <- dat_vgcv4 %>%
  ggplot(mapping=aes(x=tald, y=medconc)) +
  geom_line(size=1.5, color="orange") +
  geom_ribbon(aes(x=tald,ymin=lowconc,ymax=highconc), fill =
"orange",alpha=0.2) +
  facet_wrap( ~ study, nrow = 1,
             labeller = labeller(study=as_labeller(labelname4))) +
  theme_bw(base_size = 30) +
  scale_x_continuous("Time (h)", limits = c(0,12.1), breaks =
c(0,2,4,6,8,10,12)) +
  scale_y_continuous("Concentration (mg/L)") +
  coord_cartesian(ylim = c(0,20)) +
  ggtitle("B Infants: 10 kg, 1 year old") +
  theme (legend.position = "none",
        plot.background = element_blank(),

```

```

panel.grid.minor = element_blank(),
panel.grid.major = element_blank(),
plot.title = element_text(hjust = 0,
                           size = 30))

jpeg(filename = paste0(output_dir, "/VGCV_infants.jpg"),
      width=8000, height=2500, res=300)
print(pl4)
dev.off()

# add a blank grid by plot_grid for VGCV_neonates
f1 <- plot_grid(pl3 + theme(axis.title = element_blank()), # remove
axis titles
                NULL,
                align = "l",
                rel_widths = c(2.2,5)) # adjust the relative widths

# add a blank grid by plot_grid for VGCV_infants
f2 <- plot_grid(pl4 + theme(axis.title = element_blank()), # remove
axis titles
                NULL,
                align = "l",
                rel_widths = c(3.22,4)) # adjust the relative widths

# add a blank grid by plot_grid for VGCV_children
f3 <- plot_grid(pl1 + theme(axis.title = element_blank()), # remove
axis titles
                NULL,
                align = "l",
                rel_widths = c(6.1,2)) # adjust the relative widths

# combine GCV-Children with GCV-adults
pl <- plot_grid(f1,
                f2,
                f3,
                pl2 + theme(axis.title = element_blank()), # remove
axis titles,
                nrow = 4,
                axis = "l",
                rel_widths = c(1,1,1))

pl_neo_inf <- plot_grid(pl3 + theme(axis.title = element_blank()),
                        NULL,

```

```

        pl4 + theme(axis.title = element_blank()),
        NULL,
        nrow = 1,
        rel_widths = c(2.1, 0.8, 3, 2))

pl <- plot_grid(pl_neo_inf,
               f3,
               pl2 + theme(axis.title = element_blank()),
               nrow = 3,
               rel_widths = c(1, 1, 1))

# Add a common axis title
library(ggpubr) # annotate_figure()

p <- annotate_figure(pl, # the objective
                    left=text_grob("Concentration (mg/L)", # on the
left
                                face = "bold",
                                size = 30,
                                rot = 90), # the angle to rotate the
text
                                bottom=text_grob("Time (h)",
                                                face = "bold",
                                                size = 30))

# output -----
jpeg(filename = paste0(output_dir, "/VGCV1.jpg"),
      width=9000, height=6200, res=300)
print(p)
dev.off()

```

## R Codes of Covariate Effects Evaluation

```
rm(list=ls())
#set working directory to current folder
curr.dir<-dirname(rstudioapi::getActiveDocumentContext()$path)
setwd(curr.dir)

# library(devtools)
# devtools::install_github("nicolash2/ggbrace")

# load R packages
library(tidyverse) # for data visualisation and manipulation
library(readxl)
library(ggbrace) # for adding braces

# Create fold for figure output
output_dir <- "forest_figure"
if (!file.exists(output_dir)) {dir.create (output_dir)}

# Read in data
dat <- read_xlsx("forest_GCV230604.xlsx",sheet = "Sheet2",range =
"A1:I35",
               col_names = TRUE) %>%
  mutate(mean=(lower+upper)/2)

# reverse y labels
y_label <- rev(dat$study)

# use ggplot to draw forest figure
pl <- ggplot(data = dat, aes(x = mean, y = number)) +
  geom_point(size=0) +
  geom_vline(xintercept = 1) +
  geom_errorbarh(aes(xmin=lower, xmax=upper), height = 0.4, size = 1,
color = "darkorange") +
  scale_x_log10("Covariate effect on CL", breaks =
c(0.1,0.25,0.5,0.8,1,1.25,2,3)) +
  scale_y_continuous(NULL, expand = c(0,0),breaks = c(1:34), labels =
y_label) +
  annotate("rect", xmin = 0.8, xmax = 1.25, ymin = 0.5, ymax = 34.5,
         fill = "orange", alpha = 0.4) +
  theme_bw() +
  theme(panel.grid = element_blank(),
        rect = element_blank(),
```

```

axis.line.x = element_line(),
axis.text.x = element_text(size = 13, face = "bold"),
axis.ticks.y = element_blank(),
# add space between y labels and the graph
axis.text.y = element_text(margin = margin(0,3,0,0,"cm"),
                           # family = "serif", # Times New Roman
                           size = 13,
                           face = "bold"),
axis.title.x = element_text(margin = margin(0.7,0,0,0,"cm"),
                           size = 16, face = "bold")) +
geom_brace(aes(x=c(0.13,0.15), y=c(21,34), label = "Weight"),
            inherit.data = FALSE,
            rotate = 270,
            labelsizes = 4.5,
            labeldistance = 0.03) +
geom_brace(aes(x=c(0.14,0.15), y=c(8,12),
               label = "CLcr (20-130) [mL/min]"),
            inherit.data = FALSE,
            rotate = 270,
            labelsizes = 4.5,
            labeldistance = 0.05) +
geom_brace(aes(x=c(0.145,0.15), y=c(19,20)),
            inherit.data = FALSE,
            rotate = 270) +
annotate("text", x=0.087, y=19.5, label = bquote("CrCL: Schwartz
(20-120) [mL/min/1.73"~m^2~"]"), size = 4.5) +
geom_brace(aes(x=c(0.05,0.055), y=c(13,20),
               label = bquote("eGFR")),
            inherit.data = FALSE,
            rotate = 270,
            labelsizes = 4.5,
            labeldistance = 0.05) +
annotate("text", x=0.086, y=18, label = bquote("eGFR: Schwartz (20-
120) [mL/min/1.73"~m^2~"]"), size = 4.5) +
annotate("text", x=0.086, y=17, label = bquote("ASCC: Schwartz (20-
120) [mL/min/1.73"~m^2~"]"), size = 4.5) +
annotate("text", x=0.0895, y=16, label = bquote("eGFR: Gao (20-120)
[mL/min/1.73"~m^2~"]"), size = 4.5) +
annotate("text", x=0.0912, y=14.5, label = bquote("CKD-EPI (20-120)
[mL/min/1.73"~m^2~"]"), size = 4.5) +
geom_brace(aes(x=c(0.145,0.15), y=c(14,15)),
            inherit.data = FALSE,
            rotate = 270) +

```



```

    annotate("text", x=0.09, y=13, label = bquote("~GFR [MDRD] ~" (20-
120) [mL/min/1.73"~m^2~"]), size = 4.5) +
    annotate("text", x=0.103, y=7, label = paste("SCR (22-265)
[", "\u00B5", "mol/L]"), size = 4.5) +
    annotate("text", x=0.105, y=6, label = bquote("BSA (0.54-1.95)
["~m^2~"]), size = 4.5) +
    geom_brace(aes(x=c(0.145,0.15), y=c(4,5),label = "Sex (M/F)"),
    inherit.data = FALSE,
    rotate = 270,
    labelsize = 4.5,
    labeldistance = 0.06) +
    annotate("text", x=0.11, y=3, label = "Critically ill (Y/N)", size
= 4.5) +
    annotate("text", x=0.11, y=2, label = "Transplant (Y/N)", size =
4.5) +
    annotate("text", x=0.115, y=1, label = "CMV (Y/N)", size = 4.5) +
    geom_brace(aes(x=c(2.5,2.6), y=c(33,34),
    label = "Neonates\n(1-5) [kg]"),
    inherit.data = FALSE,
    rotate = 90,
    labelsize = 4,
    labeldistance = 0.01,
    bending = 0.23) +
    geom_brace(aes(x=c(2.5,2.6), y=c(29,32),
    label = "Infants\n(5-16) [kg]"),
    inherit.data = FALSE,
    rotate = 90,
    labelsize = 4,
    labeldistance = 0.01) +
    geom_brace(aes(x=c(2.5,2.6), y=c(24,28),
    label = "Children\n(16-40) [kg]"),
    inherit.data = FALSE,
    rotate = 90,
    labelsize = 4,
    labeldistance = 0.01) +
    geom_brace(aes(x=c(2.48,2.55), y=c(21,23),
    label = "Adults\n(40-100) [kg]"),
    inherit.data = FALSE,
    rotate = 90,
    labelsize = 4,
    labeldistance = 0.01)

# output the figure
jpeg(filename = paste0(output_dir,"/forest_GCV.jpg"),

```

```

width=6000, height=3000, res=300)
print(pl)
dev.off()

```

## R Codes of AUC Calculator based on MAP-BE

**# Online AUC calculator based on MAP-BE**

**# Author: Wenyu Yang**

**# Email: [21211030109@m.fudan.edu.cn](mailto:21211030109@m.fudan.edu.cn)**

### # Globally used objects and functions

```

# -----
# Load package libraries
library(shiny) #Interactive applications
library(plyr)
library(tidyverse) #Plotting
library(rxode2) #Differential equation solver
library(MASS)
library(rhandsontable) # dynamic table
#----- Global parameter and setting -----
-# ####
# 1. Prior PK information from a developed PPK model: Franck et al.
(2021)
# Population typical value: CL, Vc, Q, Vp, KA, F, Tlag
POPpar <- c(6.9, 9.7, 10.9, 7.6, 0.73, 0.43, 0.33)

# Omega matrix (IIV): CL, Vc, KA, F
OMEGA <- matrix(c(0.44, 0, 0, 0,
                  0, 0.59, 0, 0,
                  0, 0, 0.7, 0,
                  0, 0, 0, 0.31),4,4)

# Sigma matrix (RUV): prop.err=0, add.err=0.98 mg/L
SIGMA <-c(0, 0.98^2)

# initial etas
init_eta <- c(0,0,0,0)

# 2. Define model

```

```

# Function containing differential equations for amount in each
compartment
mod <- rxode2({
  CL = indCL;
  Vc = indVc;
  Q = indQ;
  Vp = indVp;
  KA = indKA;
  F1 = indF1;
  Tlag = indTlag;

  conc = centr/Vc; # central
  compartment concentration
  conp = peri/Vp; # peripheral
  compartment concentration
  d/dt(depot) = -KA*depot; # depot
  compartment
  d/dt(centr) = F1*KA*depot - CL*conc - Q*conc + Q*conp; # central
  compartment amount
  d/dt(peri) = Q*conc - Q*conp; # peripheral
  compartment amount
  alag(depot) = Tlag; # lag time of
  absorption

})

# 3. Define objective function for MAP estimator
# For more information on obtaining the MAP estimate,
# have a look at the following publication:
# https://www.ncbi.nlm.nih.gov/pmc/articles/PMC3339294/
obj.MAP <- function(eta, # ETA vector to optimize
  omega, # OMEGA matrix for IIV
  sigma, # sigma square for residual error
  weight,
  crcl, # creatinine clearance (mL/min/1.73 m2)
  POPpar, # typical value for individual's parameters
  mod, # model defined in RxODE
  obs_data, # data frame for observations
  dose_data # data frame for dosing
) {

  # Weight for each individual
  weight <- weight
  crcl <- crcl

```

```

# typical value of individual's model parameters
TVpar <- c(POPpar[1]*(weight/26.7)^0.75*(crcl/149.8)^0.88, # CL
(L/h)

POPpar[2]*(weight/26.7), # Vc (L)
POPpar[3], # Q (L/h)
POPpar[4]*(weight/26.7), # Vp (L)
POPpar[5], # KA (1/h)
POPpar[6], # F1
POPpar[7]) # Tlag (h)

# Define individual parameter values
theta <- c(indCL = TVpar[1]*exp(eta[1]), # CL (L/h)
indVc = TVpar[2]*exp(eta[2]), # Vc (L)
indQ = TVpar[3], # Q (L/h)
indVp = TVpar[4], # Vp (L)
indKA = TVpar[5]*exp(eta[3]), # KA (1/h)
indF1 = TVpar[6]*exp(eta[4]), # F1
indTlag = TVpar[7]) # Tlag (h)

#### Define event record
ev <- et(time = dose_data$time,
amt = dose_data$dose,
evid = 1, # dosing records
cmt = dose_data$cmt,
dur = dose_data$dur) %>%
add.sampling(obs_data$time)

# Apply RxODE for simulation
sim_data <- rxSolve(mod,theta,ev)

# Individual prediction
ipred <- sim_data$conc

# sigma2 for combined error model
sig2j <- ipred^2*sigma[1] + sigma[2]

with(obs_data, sum(log(sig2j)+(ipred - conc)^2/sig2j,na.rm=TRUE) +
t(eta) %>% solve(omega) %>% eta)
}

# 4. MAP estimator

```

```

MAP.est <- function(init_eta, obs_data, dose_data, mod, weight, crcl,
POPpar, omega, sigma) {
  # optimization with simplex method
  res <- optim(par=init_eta, fn=obj.MAP, obs_data=obs_data,
dose_data=dose_data,
              mod=mod, weight=weight, crcl=crcl, POPpar=POPpar,
omega=omega, sigma=sigma,
              method="L-BFGS-B")

  # Weight for each individual
  weight <- weight
  crcl <- crcl

  # typical value of individual's model parameters
  TVpar <- c(POPpar[1]*(weight/26.7)^0.75*(crcl/149.8)^0.88, # CL
(L/h)
            POPpar[2]*(weight/26.7), # Vc (L)
            POPpar[3], # Q (L/h)
            POPpar[4]*(weight/26.7), # Vp (L)
            POPpar[5], # KA (1/h)
            POPpar[6], # F1
            POPpar[7]) # Tlag (h)

  # eta estimated from map estimation
  map.eta <- res$par
  CL <- TVpar[1]*exp(map.eta[1])
  Vc <- TVpar[2]*exp(map.eta[2])
  Q <- TVpar[3]
  Vp <- TVpar[4]
  KA <- TVpar[5]*exp(map.eta[3])
  F1 <- TVpar[6]*exp(map.eta[4])
  Tlag <- TVpar[7]

  # Collect the individual parameter values
  map_est <- c(indCL=CL, indVc=Vc, indQ=Q, indVp=Vp, indKA=KA,
indF1=F1, indTlag=Tlag)
  return(map_est)
}

# 5. Area under the curve (AUC) calculator
aucCal <- function(time, conc){
  temp <- vector()

```

```

n <- length(time)
for(i in 1:n-1){
  temp[i] <- (time[i+1] - time[i])*(conc[i+1] + conc[i])/2
}
auc <- sum(temp)
return(auc)
}

# 6. AUC for individual
auc_ind <- function(data){
  res <- data %>%
    filter(time>=0,time <= 24) %>%
    summarise(AUC = aucCal(time,conc)) %>%
    as.numeric()
  return(res)
}

# 7. transform sample time into hour
obstimeAfterdose <- function(dose_data,sample_data){
  # remove the NA input
  dose_data <- dose_data[complete.cases(dose_data), ]
  sample_data <- sample_data[complete.cases(sample_data), ]
  # reorder the time: date, time
  dose_data <- dose_data %>%
    mutate(time = as.POSIXct(time,format="%H:%M")) %>%
    arrange(date, time)
  sample_data <- sample_data %>%
    mutate(time = as.POSIXct(time,format="%H:%M")) %>%
    arrange(date, time)

  # calculate time after the first dose
  sample_time <- as.numeric(difftime(sample_data$date,
dose_data[1,]$date, units = "hours")) +
  round(as.numeric(difftime(sample_data$time,dose_data[1,]$time,
units="hours")),2)

  obs_dat <- data.frame(time = sample_time, conc = sample_data$conc)
  return(obs_dat)
}

# 8. transform dosing time into hour
dostimeAfterdose <- function(dose_data,sample_data){
  # remove the NA input

```

```

dose_data <- dose_data[complete.cases(dose_data), ]
sample_data <- sample_data[complete.cases(sample_data), ]
# reorder the time: date, time
dose_data <- dose_data %>%
  mutate(time = as.POSIXct(time, format="%H:%M")) %>%
  arrange(date, time)
sample_data <- sample_data %>%
  mutate(time = as.POSIXct(time, format="%H:%M")) %>%
  arrange(date, time)

# calculate time after the first dose
dose_time <- as.numeric(difftime(dose_data$date,
dose_data[1,]$date, units = "hours")) +
  round(as.numeric(difftime(dose_data$time, dose_data[1,]$time,
units="hours")), 2)
#transformed dataframes
dos_dat <- data.frame(time = dose_time, dose = dose_data$dose,
  cmt = case_when(dose_data$iv=="Y" ~ "centr",
    TRUE ~ "depot"),
  dur = case_when(dose_data$iv=="Y" ~
dose_data$duration,
    TRUE ~ 0))

  return(dos_dat)
}

# 9. for plotting: raw data + individual prediction
simPlot <- function(sim_ind_data, raw_dat) {

  # Compare the concentration-time profile from simulation with
  observed data
  pl1 <- ggplot(data = sim_ind_data) +
    geom_line(aes(x = time, y = conc), size=1.5) +
    geom_point(inherit.aes = F, data = raw_dat, aes(x = time, y =
conc), color="red", size=3) +
    scale_y_continuous("Concentration (mg/L)") +
    scale_x_continuous("Time (hours)")
  return(pl1)
}

#-----Default-----
# Default table content
# rhandsonable cannot handle factor so stringsAsFactors = F
df1.Dose <- data.frame(date = c(Sys.Date(), Sys.Date()),

```

```

        time = c("08:00", "20:10"),
        dose  = c(40, 400),
        iv    = c("Y", "N"),
        duration = c(1, 0),
        stringsAsFactors = F)
df1.Sample <- data.frame(date = c(Sys.Date()),
        time = c("23:36"),
        conc = c(7.6),
        stringsAsFactors = F)

# Default table content in time
df.sample <- obstimeAfterdose(df1.Dose, df1.Sample)
df.dose <- dostimeAfterdose(df1.Dose, df1.Sample)
# Use MAP estimator for individual parameters
df_par_ind <- MAP.est(init_eta, df.sample, df.dose, mod,
        weight = 8, crcl = 96, POPpar, OMEGA, SIGMA)

df_max_time <- max(c(df.dose$time, df.sample$time))

# Sample times: when a concentration was collected
df_sample_times <- seq(from=0, to=df_max_time+36, by=0.1)
# Define event record
df_ev <- et(time = df.dose$time,
        amt = df.dose$dose,
        evid = 1, # dosing records
        dur = df.dose$dur,
        cmt = df.dose$cmt) %>%
        add.sampling(df_sample_times)

# Simulation for individual
df_ind_data <- rxSolve(mod, params = df_par_ind, events = df_ev)

```



## # Define Shiny Server

```
shinyServer(function(input, output, session) {

  # Dynamic table
  dynamicTable <- reactiveValues(dose_data = NULL)

  # add a row to the dose table
  observeEvent(input$addPoint, {
    df_temp1 <- hot_to_r(input$table1)
    # rhandsontable cannot handle factor so stringsAsFactors = F
    dynamicTable$dose_data <- data.frame(date=c(df_temp1$date, NA),
                                           time=c(df_temp1$time, NA),
                                           dose=c(df_temp1$dose, NA),
                                           iv=c(df_temp1$iv, NA),

duration=c(df_temp1$duration, NA),

                                           stringsAsFactors = F)
  })

  # drop a row from the dose table
  observeEvent(input$dropPoint, {
    df_temp1 <- hot_to_r(input$table1)
    dynamicTable$dose_data <- df_temp1[-nrow(df_temp1),]
  })

  # update the dose table
  output$table1 <- renderRHandsontable({
    # converts the R dataframe to rhandsontable object
    if (is.null(dynamicTable$dose_data))
return(rhandsontable(df1.Dose))
    rhandsontable(dynamicTable$dose_data)
  })

  # Dynamic table
  dynamicTable <- reactiveValues(data = NULL)

  # add a row to the sample table
  observeEvent(input$addLink, {
    df_temp2 <- hot_to_r(input$table2)
    # rhandsontable cannot handle factor so stringsAsFactors = F
    dynamicTable$data <- data.frame(date=c(df_temp2$date, NA),
                                      time=c(df_temp2$time, NA),
```

```

                                conc=c(df_temp2$conc,NA),
                                stringsAsFactors = F)
  })

  # drop a row from the sample table
  observeEvent(input$dropLink, {
    df_temp2 <- hot_to_r(input$table2)
    dynamicTable$data <- df_temp2[-nrow(df_temp2),]
  })

  # update the sample sample table
  output$table2 <- renderRHandsontable({
    # converts the R dataframe to rhandsontable object
    if (is.null(dynamicTable$data))
return(rhandsontable(df1.Sample))
    rhandsontable(dynamicTable$data)
  })

## bayesian forecasting result: updated by clicking action button
res <- eventReactive(input$submit, {
  set.seed(123456)
  # get the original data from table input
  dat_dose <- hot_to_r(input$table1)
  dat_sample <- hot_to_r(input$table2)
  # transform into the dataset
  obs_dat <- obstimeAfterdose(dat_dose,dat_sample)
  dos_dat <- dostimeAfterdose(dat_dose,dat_sample)
  max_time <- max(c(dos_dat$time,obs_dat$time))

  weight <- input$weight
  crcl <- input$crcl

  par_ind <- MAP.est(init_eta, obs_dat, dos_dat, mod,
                    weight, crcl, POPpar, OMEGA, SIGMA)
  # Sample times: when a concentration was collected
  sim_sample_times <- seq(from=0, to=max_time+36, by=0.1)
  # Define event record
  ev <- et(time = dos_dat$time,
          amt = dos_dat$dose,
          evid = 1, # dosing records
          dur = dos_dat$dur,
          cmt = dos_dat$cmt) %>%

```

```

    add.sampling(sim_sample_times)

    #----- Concentration-time profile simulation -----
    -----#
    # Simulation for individual
    sim_ind_data <- rxSolve(mod, params = par_ind, events = ev)

#----- PD endpoint calculation -----
# #####
# AUC
auc_ind <- auc_ind(data=sim_ind_data)

res_text <- paste0("The AUC0-24h calculated by MAP-BE method
is ", round(auc_ind,2), " mg*h/L.")

# plot individual prediction
plotobj <- simPlot(sim_ind_data = sim_ind_data, raw_dat =
obs_dat)

# return results
return(list(res_text = res_text,
            plotobj = plotobj))
})

#-----
-----#

# output

## indicator for the first click of action button
click <- reactiveValues(data = NULL)
observeEvent(input$submit, {
  click$data <- 1
})

## display a plot with original data and simulation result
output$plotConc <- renderPlot({
  if (is.null(click$data)) {
    # default plot when open the website: default case
    print(simPlot(sim_ind_data = df_ind_data, raw_dat =
df.sample))
  }else{
    # update plot by clicking action button
    print(res()$plotobj)
  }
})

```

```

    }
  }, height = function(){
    if(session$clientData$output_plotConc_width > 400) {
      return(400)
    }else{
      return(0.9*session$clientData$output_plotConc_width)
    }
  }) #Brackets closing "renderPlot" function

# Report AUC
output$res_text <- renderText({
  if (is.null(click$data)) {
    # default table when open the website:
    "The AUC0-24h calculated by MAP-BE method is 60.15 mg*h/L."
  }else{
    # update table by clicking action button
    res()$res_text
  }
}) #Brackets closing "renderText" function
#####
##_SESSION_##
#####
# Close the R session when Chrome closes
session$onSessionEnded(function() {
  stopApp()
})

}) #shinyServer

```

## # Define UI of Shiny app

```
# Define UI
fixedPage(
  # Application Title and Logo
  fixedRow(
    column(12,
      h3("AUC0-24h Calculator of valganciclovir and
ganciclovir"),
      align = "center")
  ), #Brackets closing "fixedRow"
  # Add a break with a horizontal line
  # Sidebar panel with widgets
  sidebarLayout(
    sidebarPanel(
      h4("Patient information:"),
      # input weight
      numericInput('weight', label = h4("Weight (kg):"), 8, min =
0, max = 200),
      # input scr
      numericInput('crcl', label = h4("CrCL (mL/min/1.73 m2):"),
96, min = 0, max = 500),

      h4("Dose record (mg)"),
      rHandsontableOutput("table1"),
      # add a row to table
      actionLink("addPoint", "Add"),
      # drop a row from table
      actionLink("dropPoint", "Drop"),

      # Sample concentration record table
      h4("Sample record (mg/L)"),
      rHandsontableOutput("table2"),
      # add a row to table
      actionLink("addLink", "Add"),
      # drop a row from table
      actionLink("dropLink", "Drop"),
      br(),
      # actionButton
      actionButton("submit", "Calculate",
        icon = icon("refresh")), #actionButton

      align = "left",
      width = 5
    )
  )
)
```

```

), #sidebarPanel

# Main panel to contain help notes and result
mainPanel(
  width = 7,
  # Plot output for concentration-time profile
  fixedRow(
    plotOutput("plotConc",width="95%")
  ),
  hr(),
  h4("The result of AUC:",align="left"),
  verbatimTextOutput("res_text"),
  align = "center",
  hr(),
  h6("The PopPK model we used in this AUC calculator was
developed by Franck et al.",
    align="right"),
  h6("For more information on the PopPK model, please look at
the following publication:",align="right"),
  h6(span("https://pubmed.ncbi.nlm.nih.gov/33373493/", style
= "color:blue"), align="right"),
  tags$a(href="https://pubmed.ncbi.nlm.nih.gov/33373493/",
target="_blank",
    h5("Click here!",align="right"))
) #mainPanel
), #sidebarLayout
) #fixedPage

```

## Validation of the AUC<sub>0-24h</sub> calculator with NONMEM

To prove the reliability of our AUC calculator, we compared AUC calculator's results with NONMEM's results in 3 different virtual patients.

### 1. Virtual patients' demographics

| ID                                | 1  | 2   | 3  |
|-----------------------------------|----|-----|----|
| Weight (kg)                       | 15 | 100 | 5  |
| CrCL (mL/min/1.73m <sup>2</sup> ) | 90 | 250 | 35 |

### 2. Dosing records

|                            | 1  |      |      | 2   |      |      | 3  |      |      |
|----------------------------|----|------|------|-----|------|------|----|------|------|
| Time (h)                   | 0  | 11.5 | 23.5 | 0   | 11.5 | 23.5 | 0  | 11.5 | 23.5 |
| Dose (mg)                  | 75 | 75   | 75   | 800 | 1000 | 1000 | 30 | 50   | 50   |
| Intravenous infusion (Y/N) | Y  | Y    | Y    | N   | N    | N    | Y  | N    | N    |
| Infusion during (h)        | 1  | 1    | 1    | 0   | 0    | 0    | 1  | 0    | 0    |

### 3. Sampling records

|                      | 1   |     | 2  |     | 3   |    |
|----------------------|-----|-----|----|-----|-----|----|
| Time (h)             | 23  | 25  | 23 | 25  | 23  | 25 |
| Concentration (mg/L) | 0.8 | 3.2 | 1  | 3.8 | 0.6 | 3  |

### 4. Estimates of individual PK parameters

|                  | 1              |         | 2              |          | 3              |         |
|------------------|----------------|---------|----------------|----------|----------------|---------|
|                  | AUC calculator | NONMEM  | AUC calculator | NONMEM   | AUC calculator | NONMEM  |
| CL               | 3.953227       | 3.9532  | 23.5186454     | 23.51800 | 0.7082963      | 0.70829 |
| V <sub>c</sub>   | 11.112090      | 11.1120 | 40.5690043     | 40.56900 | 1.8278532      | 1.82790 |
| Q                | 10.900000      | 10.9000 | 10.900000      | 10.9000  | 10.900000      | 10.9000 |
| V <sub>p</sub>   | 4.269663       | 4.2697  | 28.4644195     | 28.46400 | 1.4232210      | 1.42320 |
| T <sub>lag</sub> | 0.330000       | 0.3300  | 0.330000       | 0.3300   | 0.330000       | 0.3300  |
| K <sub>a</sub>   | 0.730000       | 0.7300  | 0.6456028      | 0.64560  | 0.6596735      | 0.65967 |
| F                | 0.430000       | 0.4300  | 0.4518597      | 0.45186  | 0.3590508      | 0.35905 |

### 5. Results of AUC<sub>0-24h</sub>

|                      | 1              |          | 2              |          | 3              |          |
|----------------------|----------------|----------|----------------|----------|----------------|----------|
|                      | AUC calculator | NONMEM   | AUC calculator | NONMEM   | AUC calculator | NONMEM   |
| AUC <sub>0-24h</sub> | 37.67698       | 37.67698 | 33.51024       | 33.51049 | 64.80461       | 64.80505 |

So, the calculation result of AUC<sub>0-24h</sub> calculator is reliable.
